# Supplementary material for: Quantification of the hepatitis B virus cccDNA: evidence-based guidelines for monitoring the key obstacle of HBV cure
Source: HighWire-hosted journal article supplement (doi:10.1136/gutjnl-2022-328380), 2023-01-27
Supplement: gutjnl-2022-328380supp002_data_supplement.xlsx [file gutjnl-2022-328380supp002_data_supplement.xlsx]

## Sheet: Allgemein
In silico analysis of the inclusivity of the qPCR used in this study for the detection of HBV cccDNA
Method: The latest 10,000 HBV genome sequence entries were retrieved from NCBI GenBank. Of these 10,000 sequences, 8,959 sequences had full coverage of the primer and probe binding sites and were aligned with each other and then compared with the primer and probe sequences.
Eight sequences did not show any complementarity for either probe or reverse primer sequence and were excluded from the alignment (see end of the table).
HBV sequences with known genotype information as per their TaxIDs were analyzed separately (see following tabs).
	forward primer sequence	probe sequence	reverse primer sequence	sequence of forward primer, probe and reverse primer stitched
NCBI accession number	CCGTGTGCACTTCGCTTCA	CATGGAGACCACCGTGAACGCCC	TCAAGCCTCCAAGCTGTGC	CCGTGTGCACTTCGCTTCACATGGAGACCACCGTGAACGCCCTCAAGCCTCCAAGCTGTGC	number of mismatches	number of sequences with this particular pattern of mismatches	% of analyzed sequences
GU563552.1	...................	.......................	...................	.............................................................	0	6606	0.738018
KJ533386.1	...................	.......................	...................	.............................................................	0	6606	0.738018
MW567974.1	...................	.......................	...................	.............................................................	0	6606	0.738018
MK534629.1	...................	.......................	...................	.............................................................	0	6606	0.738018
KY881792.1	...................	.......................	...................	.............................................................	0	6606	0.738018
OM669602.1	...................	.......................	...................	.............................................................	0	6606	0.738018
MG571325.1	...................	.......................	...................	.............................................................	0	6606	0.738018
OM669680.1	...................	.......................	...................	.............................................................	0	6606	0.738018
OM669678.1	...................	.......................	...................	.............................................................	0	6606	0.738018
OM669611.1	...................	.......................	...................	.............................................................	0	6606	0.738018
KJ803805.1	...................	.......................	...................	.............................................................	0	6606	0.738018
OM669575.1	...................	.......................	...................	.............................................................	0	6606	0.738018
KM875408.1	...................	.......................	...................	.............................................................	0	6606	0.738018
KM875409.1	...................	.......................	...................	.............................................................	0	6606	0.738018
EU564825.1	...................	.......................	...................	.............................................................	0	6606	0.738018
KX276778.1	...................	.......................	...................	.............................................................	0	6606	0.738018
MG571352.1	...................	.......................	...................	.............................................................	0	6606	0.738018
MK818223.1	...................	.......................	...................	.............................................................	0	6606	0.738018
MT622522.1	...................	.......................	...................	.............................................................	0	6606	0.738018
KX276804.1	...................	.......................	...................	.............................................................	0	6606	0.738018
FJ562311.1	...................	.......................	...................	.............................................................	0	6606	0.738018
GQ377644.1	...................	.......................	...................	.............................................................	0	6606	0.738018
KX276791.1	...................	.......................	...................	.............................................................	0	6606	0.738018
KX276793.1	...................	.......................	...................	.............................................................	0	6606	0.738018
OM669612.1	...................	.......................	...................	.............................................................	0	6606	0.738018
MK818225.1	...................	.......................	...................	.............................................................	0	6606	0.738018
KX276774.1	...................	.......................	...................	.............................................................	0	6606	0.738018
OM669677.1	...................	.......................	...................	.............................................................	0	6606	0.738018
KX276771.1	...................	.......................	...................	.............................................................	0	6606	0.738018
KX276781.1	...................	.......................	...................	.............................................................	0	6606	0.738018
GQ924630.1	...................	.......................	...................	.............................................................	0	6606	0.738018
OM669663.1	...................	.......................	...................	.............................................................	0	6606	0.738018
HM011480.1	...................	.......................	...................	.............................................................	0	6606	0.738018
KJ803797.1	...................	.......................	...................	.............................................................	0	6606	0.738018
EU660233.1	...................	.......................	...................	.............................................................	0	6606	0.738018
EU660232.1	...................	.......................	...................	.............................................................	0	6606	0.738018
EU660231.1	...................	.......................	...................	.............................................................	0	6606	0.738018
EU660230.1	...................	.......................	...................	.............................................................	0	6606	0.738018
MG571337.1	...................	.......................	...................	.............................................................	0	6606	0.738018
FJ562312.1	...................	.......................	...................	.............................................................	0	6606	0.738018
KX276811.1	...................	.......................	...................	.............................................................	0	6606	0.738018
KM875426.1	...................	.......................	...................	.............................................................	0	6606	0.738018
GU332691.1	...................	.......................	...................	.............................................................	0	6606	0.738018
OM669591.1	...................	.......................	...................	.............................................................	0	6606	0.738018
EU570075.1	...................	.......................	...................	.............................................................	0	6606	0.738018
OM669675.1	...................	.......................	...................	.............................................................	0	6606	0.738018
MT645016.1	...................	.......................	...................	.............................................................	0	6606	0.738018
OM669572.1	...................	.......................	...................	.............................................................	0	6606	0.738018
KM392084.1	...................	.......................	...................	.............................................................	0	6606	0.738018
KC510646.1	...................	.......................	...................	.............................................................	0	6606	0.738018
HM011476.1	...................	.......................	...................	.............................................................	0	6606	0.738018
HM011498.1	...................	.......................	...................	.............................................................	0	6606	0.738018
MG571358.1	...................	.......................	...................	.............................................................	0	6606	0.738018
HM011473.1	...................	.......................	...................	.............................................................	0	6606	0.738018
KX276806.1	...................	.......................	...................	.............................................................	0	6606	0.738018
KJ803789.1	...................	.......................	...................	.............................................................	0	6606	0.738018
MT645005.1	...................	.......................	...................	.............................................................	0	6606	0.738018
OM669617.1	...................	.......................	...................	.............................................................	0	6606	0.738018
HM011474.1	...................	.......................	...................	.............................................................	0	6606	0.738018
GU332705.1	...................	.......................	...................	.............................................................	0	6606	0.738018
GU332701.1	...................	.......................	...................	.............................................................	0	6606	0.738018
GU332694.1	...................	.......................	...................	.............................................................	0	6606	0.738018
GU332692.1	...................	.......................	...................	.............................................................	0	6606	0.738018
GU332693.1	...................	.......................	...................	.............................................................	0	6606	0.738018
GU332706.1	...................	.......................	...................	.............................................................	0	6606	0.738018
GU168596.1	...................	.......................	...................	.............................................................	0	6606	0.738018
GU168595.1	...................	.......................	...................	.............................................................	0	6606	0.738018
GU332697.1	...................	.......................	...................	.............................................................	0	6606	0.738018
GU168597.1	...................	.......................	...................	.............................................................	0	6606	0.738018
GU332707.1	...................	.......................	...................	.............................................................	0	6606	0.738018
GU168594.1	...................	.......................	...................	.............................................................	0	6606	0.738018
GU332702.1	...................	.......................	...................	.............................................................	0	6606	0.738018
GU332704.1	...................	.......................	...................	.............................................................	0	6606	0.738018
OM669569.1	...................	.......................	...................	.............................................................	0	6606	0.738018
OM669567.1	...................	.......................	...................	.............................................................	0	6606	0.738018
OM669568.1	...................	.......................	...................	.............................................................	0	6606	0.738018
KM392079.1	...................	.......................	...................	.............................................................	0	6606	0.738018
OM669618.1	...................	.......................	...................	.............................................................	0	6606	0.738018
OM669593.1	...................	.......................	...................	.............................................................	0	6606	0.738018
JQ801474.1	...................	.......................	...................	.............................................................	0	6606	0.738018
JQ027325.1	...................	.......................	...................	.............................................................	0	6606	0.738018
OM669590.1	...................	.......................	...................	.............................................................	0	6606	0.738018
OM669613.1	...................	.......................	...................	.............................................................	0	6606	0.738018
MG571357.1	...................	.......................	...................	.............................................................	0	6606	0.738018
KX276801.1	...................	.......................	...................	.............................................................	0	6606	0.738018
FJ562259.1	...................	.......................	...................	.............................................................	0	6606	0.738018
KM392077.1	...................	.......................	...................	.............................................................	0	6606	0.738018
HM011494.1	...................	.......................	...................	.............................................................	0	6606	0.738018
KY881784.1	...................	.......................	...................	.............................................................	0	6606	0.738018
JQ040138.1	...................	.......................	...................	.............................................................	0	6606	0.738018
FJ032353.1	...................	.......................	...................	.............................................................	0	6606	0.738018
FJ032352.1	...................	.......................	...................	.............................................................	0	6606	0.738018
MG372436.1	...................	.......................	...................	.............................................................	0	6606	0.738018
OM669596.1	...................	.......................	...................	.............................................................	0	6606	0.738018
MK534727.1	...................	.......................	...................	.............................................................	0	6606	0.738018
FJ386660.1	...................	.......................	...................	.............................................................	0	6606	0.738018
FJ386615.1	...................	.......................	...................	.............................................................	0	6606	0.738018
GQ924632.1	...................	.......................	...................	.............................................................	0	6606	0.738018
KX276782.1	...................	.......................	...................	.............................................................	0	6606	0.738018
KJ803782.1	...................	.......................	...................	.............................................................	0	6606	0.738018
KJ173418.1	...................	.......................	...................	.............................................................	0	6606	0.738018
KJ173419.1	...................	.......................	...................	.............................................................	0	6606	0.738018
GQ924648.1	...................	.......................	...................	.............................................................	0	6606	0.738018
MG571336.1	...................	.......................	...................	.............................................................	0	6606	0.738018
MG571354.1	...................	.......................	...................	.............................................................	0	6606	0.738018
MT740719.1	...................	.......................	...................	.............................................................	0	6606	0.738018
JQ040170.1	...................	.......................	...................	.............................................................	0	6606	0.738018
JX026879.1	...................	.......................	...................	.............................................................	0	6606	0.738018
FJ562296.1	...................	.......................	...................	.............................................................	0	6606	0.738018
FJ386688.1	...................	.......................	...................	.............................................................	0	6606	0.738018
OM669600.1	...................	.......................	...................	.............................................................	0	6606	0.738018
OM669584.1	...................	.......................	...................	.............................................................	0	6606	0.738018
KC510656.1	...................	.......................	...................	.............................................................	0	6606	0.738018
KC510645.1	...................	.......................	...................	.............................................................	0	6606	0.738018
KC510659.1	...................	.......................	...................	.............................................................	0	6606	0.738018
KC510653.1	...................	.......................	...................	.............................................................	0	6606	0.738018
FJ562222.1	...................	.......................	...................	.............................................................	0	6606	0.738018
OM669657.1	...................	.......................	...................	.............................................................	0	6606	0.738018
OM669588.1	...................	.......................	...................	.............................................................	0	6606	0.738018
OM669583.1	...................	.......................	...................	.............................................................	0	6606	0.738018
FJ899787.1	...................	.......................	...................	.............................................................	0	6606	0.738018
FJ899786.1	...................	.......................	...................	.............................................................	0	6606	0.738018
FJ899784.1	...................	.......................	...................	.............................................................	0	6606	0.738018
KX276809.1	...................	.......................	...................	.............................................................	0	6606	0.738018
AB981581.1	...................	.......................	...................	.............................................................	0	6606	0.738018
AB981582.1	...................	.......................	...................	.............................................................	0	6606	0.738018
AB981583.1	...................	.......................	...................	.............................................................	0	6606	0.738018
KX276799.1	...................	.......................	...................	.............................................................	0	6606	0.738018
MF674465.1	...................	.......................	...................	.............................................................	0	6606	0.738018
OM669651.1	...................	.......................	...................	.............................................................	0	6606	0.738018
FJ386608.1	...................	.......................	...................	.............................................................	0	6606	0.738018
OM669599.1	...................	.......................	...................	.............................................................	0	6606	0.738018
OM669574.1	...................	.......................	...................	.............................................................	0	6606	0.738018
JF436921.1	...................	.......................	...................	.............................................................	0	6606	0.738018
OM669669.1	...................	.......................	...................	.............................................................	0	6606	0.738018
OM669570.1	...................	.......................	...................	.............................................................	0	6606	0.738018
OM669668.1	...................	.......................	...................	.............................................................	0	6606	0.738018
OM669608.1	...................	.......................	...................	.............................................................	0	6606	0.738018
AY163870.1	...................	.......................	...................	.............................................................	0	6606	0.738018
KC774405.1	...................	.......................	...................	.............................................................	0	6606	0.738018
KC774362.1	...................	.......................	...................	.............................................................	0	6606	0.738018
KC774386.1	...................	.......................	...................	.............................................................	0	6606	0.738018
KX276785.1	...................	.......................	...................	.............................................................	0	6606	0.738018
KX276784.1	...................	.......................	...................	.............................................................	0	6606	0.738018
MK534602.1	...................	.......................	...................	.............................................................	0	6606	0.738018
OM669671.1	...................	.......................	...................	.............................................................	0	6606	0.738018
OM669667.1	...................	.......................	...................	.............................................................	0	6606	0.738018
LC535909.1	...................	.......................	...................	.............................................................	0	6606	0.738018
HM011503.1	...................	.......................	...................	.............................................................	0	6606	0.738018
OM669610.1	...................	.......................	...................	.............................................................	0	6606	0.738018
MG571376.1	...................	.......................	...................	.............................................................	0	6606	0.738018
MG571353.1	...................	.......................	...................	.............................................................	0	6606	0.738018
FJ562246.1	...................	.......................	...................	.............................................................	0	6606	0.738018
OM669587.1	...................	.......................	...................	.............................................................	0	6606	0.738018
OM669577.1	...................	.......................	...................	.............................................................	0	6606	0.738018
GQ377606.1	...................	.......................	...................	.............................................................	0	6606	0.738018
OM669652.1	...................	.......................	...................	.............................................................	0	6606	0.738018
MZ671238.1	...................	.......................	...................	.............................................................	0	6606	0.738018
KJ410517.1	...................	.......................	...................	.............................................................	0	6606	0.738018
KJ410507.1	...................	.......................	...................	.............................................................	0	6606	0.738018
KJ173370.1	...................	.......................	...................	.............................................................	0	6606	0.738018
JX869998.1	...................	.......................	...................	.............................................................	0	6606	0.738018
GU815558.1	...................	.......................	...................	.............................................................	0	6606	0.738018
MG571365.1	...................	.......................	...................	.............................................................	0	6606	0.738018
GU815554.1	...................	.......................	...................	.............................................................	0	6606	0.738018
MG571342.1	...................	.......................	...................	.............................................................	0	6606	0.738018
KJ173424.1	...................	.......................	...................	.............................................................	0	6606	0.738018
KM392083.1	...................	.......................	...................	.............................................................	0	6606	0.738018
GU815615.1	...................	.......................	...................	.............................................................	0	6606	0.738018
GU815619.1	...................	.......................	...................	.............................................................	0	6606	0.738018
GU815678.1	...................	.......................	...................	.............................................................	0	6606	0.738018
GU815634.1	...................	.......................	...................	.............................................................	0	6606	0.738018
GU815617.1	...................	.......................	...................	.............................................................	0	6606	0.738018
GU815622.1	...................	.......................	...................	.............................................................	0	6606	0.738018
GU815640.1	...................	.......................	...................	.............................................................	0	6606	0.738018
GU815635.1	...................	.......................	...................	.............................................................	0	6606	0.738018
GU815627.1	...................	.......................	...................	.............................................................	0	6606	0.738018
GU815616.1	...................	.......................	...................	.............................................................	0	6606	0.738018
GU815642.1	...................	.......................	...................	.............................................................	0	6606	0.738018
GU815625.1	...................	.......................	...................	.............................................................	0	6606	0.738018
GU815671.1	...................	.......................	...................	.............................................................	0	6606	0.738018
GU815655.1	...................	.......................	...................	.............................................................	0	6606	0.738018
GU815657.1	...................	.......................	...................	.............................................................	0	6606	0.738018
KM875416.1	...................	.......................	...................	.............................................................	0	6606	0.738018
KM875417.1	...................	.......................	...................	.............................................................	0	6606	0.738018
KJ803763.1	...................	.......................	...................	.............................................................	0	6606	0.738018
JX869999.1	...................	.......................	...................	.............................................................	0	6606	0.738018
MG571366.1	...................	.......................	...................	.............................................................	0	6606	0.738018
JN827419.1	...................	.......................	...................	.............................................................	0	6606	0.738018
JX507215.1	...................	.......................	...................	.............................................................	0	6606	0.738018
KC774398.1	...................	.......................	...................	.............................................................	0	6606	0.738018
GQ377558.1	...................	.......................	...................	.............................................................	0	6606	0.738018
KJ173364.1	...................	.......................	...................	.............................................................	0	6606	0.738018
KC510654.1	...................	.......................	...................	.............................................................	0	6606	0.738018
KY470962.1	...................	.......................	...................	.............................................................	0	6606	0.738018
FJ386610.1	...................	.......................	...................	.............................................................	0	6606	0.738018
FJ787444.1	...................	.......................	...................	.............................................................	0	6606	0.738018
MN535019.1	...................	.......................	...................	.............................................................	0	6606	0.738018
KM392074.1	...................	.......................	...................	.............................................................	0	6606	0.738018
KM392073.1	...................	.......................	...................	.............................................................	0	6606	0.738018
JQ040173.1	...................	.......................	...................	.............................................................	0	6606	0.738018
MF674426.1	...................	.......................	...................	.............................................................	0	6606	0.738018
KC510650.1	...................	.......................	...................	.............................................................	0	6606	0.738018
KC510643.1	...................	.......................	...................	.............................................................	0	6606	0.738018
KC510647.1	...................	.......................	...................	.............................................................	0	6606	0.738018
KC774403.1	...................	.......................	...................	.............................................................	0	6606	0.738018
GQ377643.1	...................	.......................	...................	.............................................................	0	6606	0.738018
GQ377612.1	...................	.......................	...................	.............................................................	0	6606	0.738018
MK534570.1	...................	.......................	...................	.............................................................	0	6606	0.738018
FJ386683.1	...................	.......................	...................	.............................................................	0	6606	0.738018
KJ173416.1	...................	.......................	...................	.............................................................	0	6606	0.738018
KJ173417.1	...................	.......................	...................	.............................................................	0	6606	0.738018
FJ032357.1	...................	.......................	...................	.............................................................	0	6606	0.738018
GU434372.1	...................	.......................	...................	.............................................................	0	6606	0.738018
GU434373.1	...................	.......................	...................	.............................................................	0	6606	0.738018
JQ040125.1	...................	.......................	...................	.............................................................	0	6606	0.738018
KJ173367.1	...................	.......................	...................	.............................................................	0	6606	0.738018
KJ173381.1	...................	.......................	...................	.............................................................	0	6606	0.738018
KJ173415.1	...................	.......................	...................	.............................................................	0	6606	0.738018
KJ173382.1	...................	.......................	...................	.............................................................	0	6606	0.738018
KJ173413.1	...................	.......................	...................	.............................................................	0	6606	0.738018
MK052964.1	...................	.......................	...................	.............................................................	0	6606	0.738018
MT645057.1	...................	.......................	...................	.............................................................	0	6606	0.738018
MT645058.1	...................	.......................	...................	.............................................................	0	6606	0.738018
KJ173355.1	...................	.......................	...................	.............................................................	0	6606	0.738018
KJ173356.1	...................	.......................	...................	.............................................................	0	6606	0.738018
KJ173353.1	...................	.......................	...................	.............................................................	0	6606	0.738018
MK052962.1	...................	.......................	...................	.............................................................	0	6606	0.738018
MG571362.1	...................	.......................	...................	.............................................................	0	6606	0.738018
MG571355.1	...................	.......................	...................	.............................................................	0	6606	0.738018
MK534707.1	...................	.......................	...................	.............................................................	0	6606	0.738018
AB675676.1	...................	.......................	...................	.............................................................	0	6606	0.738018
EU522067.1	...................	.......................	...................	.............................................................	0	6606	0.738018
KJ173376.1	...................	.......................	...................	.............................................................	0	6606	0.738018
KJ173375.1	...................	.......................	...................	.............................................................	0	6606	0.738018
KJ173361.1	...................	.......................	...................	.............................................................	0	6606	0.738018
GQ924634.1	...................	.......................	...................	.............................................................	0	6606	0.738018
MK534571.1	...................	.......................	...................	.............................................................	0	6606	0.738018
GU357842.1	...................	.......................	...................	.............................................................	0	6606	0.738018
KM392076.1	...................	.......................	...................	.............................................................	0	6606	0.738018
MH663473.1	...................	.......................	...................	.............................................................	0	6606	0.738018
MZ934427.1	...................	.......................	...................	.............................................................	0	6606	0.738018
JQ801471.1	...................	.......................	...................	.............................................................	0	6606	0.738018
MK534599.1	...................	.......................	...................	.............................................................	0	6606	0.738018
MK534692.1	...................	.......................	...................	.............................................................	0	6606	0.738018
FJ518812.1	...................	.......................	...................	.............................................................	0	6606	0.738018
GQ377638.1	...................	.......................	...................	.............................................................	0	6606	0.738018
GQ377639.1	...................	.......................	...................	.............................................................	0	6606	0.738018
GQ377587.1	...................	.......................	...................	.............................................................	0	6606	0.738018
KC774396.1	...................	.......................	...................	.............................................................	0	6606	0.738018
KC774374.1	...................	.......................	...................	.............................................................	0	6606	0.738018
MG571374.1	...................	.......................	...................	.............................................................	0	6606	0.738018
GQ924606.1	...................	.......................	...................	.............................................................	0	6606	0.738018
MZ671236.1	...................	.......................	...................	.............................................................	0	6606	0.738018
MZ675786.1	...................	.......................	...................	.............................................................	0	6606	0.738018
MZ671237.1	...................	.......................	...................	.............................................................	0	6606	0.738018
KJ173344.1	...................	.......................	...................	.............................................................	0	6606	0.738018
KJ173346.1	...................	.......................	...................	.............................................................	0	6606	0.738018
KJ173343.1	...................	.......................	...................	.............................................................	0	6606	0.738018
KJ173345.1	...................	.......................	...................	.............................................................	0	6606	0.738018
KM392072.1	...................	.......................	...................	.............................................................	0	6606	0.738018
GU815639.1	...................	.......................	...................	.............................................................	0	6606	0.738018
GU815670.1	...................	.......................	...................	.............................................................	0	6606	0.738018
KJ173403.1	...................	.......................	...................	.............................................................	0	6606	0.738018
KJ173404.1	...................	.......................	...................	.............................................................	0	6606	0.738018
OM669607.1	...................	.......................	...................	.............................................................	0	6606	0.738018
JX507210.1	...................	.......................	...................	.............................................................	0	6606	0.738018
FJ562219.1	...................	.......................	...................	.............................................................	0	6606	0.738018
FJ032358.1	...................	.......................	...................	.............................................................	0	6606	0.738018
JX504538.1	...................	.......................	...................	.............................................................	0	6606	0.738018
OM669576.1	...................	.......................	...................	.............................................................	0	6606	0.738018
JQ801507.1	...................	.......................	...................	.............................................................	0	6606	0.738018
GQ924611.1	...................	.......................	...................	.............................................................	0	6606	0.738018
MG571364.1	...................	.......................	...................	.............................................................	0	6606	0.738018
KJ173368.1	...................	.......................	...................	.............................................................	0	6606	0.738018
MG571347.1	...................	.......................	...................	.............................................................	0	6606	0.738018
FJ386681.1	...................	.......................	...................	.............................................................	0	6606	0.738018
MG571372.1	...................	.......................	...................	.............................................................	0	6606	0.738018
OM669622.1	...................	.......................	...................	.............................................................	0	6606	0.738018
GQ377519.1	...................	.......................	...................	.............................................................	0	6606	0.738018
KC774415.1	...................	.......................	...................	.............................................................	0	6606	0.738018
MG571323.1	...................	.......................	...................	.............................................................	0	6606	0.738018
JQ040128.1	...................	.......................	...................	.............................................................	0	6606	0.738018
KY881786.1	...................	.......................	...................	.............................................................	0	6606	0.738018
KY881788.1	...................	.......................	...................	.............................................................	0	6606	0.738018
OM669660.1	...................	.......................	...................	.............................................................	0	6606	0.738018
OM669659.1	...................	.......................	...................	.............................................................	0	6606	0.738018
HM153811.1	...................	.......................	...................	.............................................................	0	6606	0.738018
OM669605.1	...................	.......................	...................	.............................................................	0	6606	0.738018
OM669656.1	...................	.......................	...................	.............................................................	0	6606	0.738018
KC774406.1	...................	.......................	...................	.............................................................	0	6606	0.738018
KC774395.1	...................	.......................	...................	.............................................................	0	6606	0.738018
KC774365.1	...................	.......................	...................	.............................................................	0	6606	0.738018
KC774366.1	...................	.......................	...................	.............................................................	0	6606	0.738018
AF100309.1	...................	.......................	...................	.............................................................	0	6606	0.738018
KY470953.1	...................	.......................	...................	.............................................................	0	6606	0.738018
AF100308.1	...................	.......................	...................	.............................................................	0	6606	0.738018
KJ173363.1	...................	.......................	...................	.............................................................	0	6606	0.738018
LC318704.1	...................	.......................	...................	.............................................................	0	6606	0.738018
KC510651.1	...................	.......................	...................	.............................................................	0	6606	0.738018
KC510655.1	...................	.......................	...................	.............................................................	0	6606	0.738018
KC510652.1	...................	.......................	...................	.............................................................	0	6606	0.738018
OM669676.1	...................	.......................	...................	.............................................................	0	6606	0.738018
OM669674.1	...................	.......................	...................	.............................................................	0	6606	0.738018
KC774413.1	...................	.......................	...................	.............................................................	0	6606	0.738018
FJ386582.1	...................	.......................	...................	.............................................................	0	6606	0.738018
FJ386654.1	...................	.......................	...................	.............................................................	0	6606	0.738018
FJ386666.1	...................	.......................	...................	.............................................................	0	6606	0.738018
FJ386636.1	...................	.......................	...................	.............................................................	0	6606	0.738018
FJ386682.1	...................	.......................	...................	.............................................................	0	6606	0.738018
MT645041.1	...................	.......................	...................	.............................................................	0	6606	0.738018
OM669601.1	...................	.......................	...................	.............................................................	0	6606	0.738018
JQ801512.1	...................	.......................	...................	.............................................................	0	6606	0.738018
MT645025.1	...................	.......................	...................	.............................................................	0	6606	0.738018
MK534733.1	...................	.......................	...................	.............................................................	0	6606	0.738018
GQ475340.1	...................	.......................	...................	.............................................................	0	6606	0.738018
KJ173412.1	...................	.......................	...................	.............................................................	0	6606	0.738018
KJ173411.1	...................	.......................	...................	.............................................................	0	6606	0.738018
MG571371.1	...................	.......................	...................	.............................................................	0	6606	0.738018
FJ562322.1	...................	.......................	...................	.............................................................	0	6606	0.738018
KJ173420.1	...................	.......................	...................	.............................................................	0	6606	0.738018
KJ173421.1	...................	.......................	...................	.............................................................	0	6606	0.738018
OM669585.1	...................	.......................	...................	.............................................................	0	6606	0.738018
MK534694.1	...................	.......................	...................	.............................................................	0	6606	0.738018
MW310262.1	...................	.......................	...................	.............................................................	0	6606	0.738018
JX429899.1	...................	.......................	...................	.............................................................	0	6606	0.738018
JN406371.1	...................	.......................	...................	.............................................................	0	6606	0.738018
KJ843165.1	...................	.......................	...................	.............................................................	0	6606	0.738018
OM669606.1	...................	.......................	...................	.............................................................	0	6606	0.738018
MZ934437.1	...................	.......................	...................	.............................................................	0	6606	0.738018
MZ934426.1	...................	.......................	...................	.............................................................	0	6606	0.738018
MZ934436.1	...................	.......................	...................	.............................................................	0	6606	0.738018
MZ934440.1	...................	.......................	...................	.............................................................	0	6606	0.738018
MW497299.1	...................	.......................	...................	.............................................................	0	6606	0.738018
GU815747.1	...................	.......................	...................	.............................................................	0	6606	0.738018
GU815748.1	...................	.......................	...................	.............................................................	0	6606	0.738018
GU815780.1	...................	.......................	...................	.............................................................	0	6606	0.738018
GU815778.1	...................	.......................	...................	.............................................................	0	6606	0.738018
GU815783.1	...................	.......................	...................	.............................................................	0	6606	0.738018
GU815777.1	...................	.......................	...................	.............................................................	0	6606	0.738018
GU815775.1	...................	.......................	...................	.............................................................	0	6606	0.738018
GU815776.1	...................	.......................	...................	.............................................................	0	6606	0.738018
MT111595.1	...................	.......................	...................	.............................................................	0	6606	0.738018
GU815721.1	...................	.......................	...................	.............................................................	0	6606	0.738018
GU815729.1	...................	.......................	...................	.............................................................	0	6606	0.738018
GU815733.1	...................	.......................	...................	.............................................................	0	6606	0.738018
GU815727.1	...................	.......................	...................	.............................................................	0	6606	0.738018
GU815714.1	...................	.......................	...................	.............................................................	0	6606	0.738018
GU815716.1	...................	.......................	...................	.............................................................	0	6606	0.738018
GU815718.1	...................	.......................	...................	.............................................................	0	6606	0.738018
GU815713.1	...................	.......................	...................	.............................................................	0	6606	0.738018
GU815717.1	...................	.......................	...................	.............................................................	0	6606	0.738018
GU815719.1	...................	.......................	...................	.............................................................	0	6606	0.738018
GU815715.1	...................	.......................	...................	.............................................................	0	6606	0.738018
AP011084.1	...................	.......................	...................	.............................................................	0	6606	0.738018
MF674506.1	...................	.......................	...................	.............................................................	0	6606	0.738018
FJ386642.1	...................	.......................	...................	.............................................................	0	6606	0.738018
MG571356.1	...................	.......................	...................	.............................................................	0	6606	0.738018
MF674480.1	...................	.......................	...................	.............................................................	0	6606	0.738018
JX429897.1	...................	.......................	...................	.............................................................	0	6606	0.738018
KJ173357.1	...................	.......................	...................	.............................................................	0	6606	0.738018
KJ173351.1	...................	.......................	...................	.............................................................	0	6606	0.738018
KJ173389.1	...................	.......................	...................	.............................................................	0	6606	0.738018
KJ173390.1	...................	.......................	...................	.............................................................	0	6606	0.738018
MG571349.1	...................	.......................	...................	.............................................................	0	6606	0.738018
MK534554.1	...................	.......................	...................	.............................................................	0	6606	0.738018
MK534627.1	...................	.......................	...................	.............................................................	0	6606	0.738018
KR232337.1	...................	.......................	...................	.............................................................	0	6606	0.738018
KJ173371.1	...................	.......................	...................	.............................................................	0	6606	0.738018
KC774404.1	...................	.......................	...................	.............................................................	0	6606	0.738018
KJ803764.1	...................	.......................	...................	.............................................................	0	6606	0.738018
KC774381.1	...................	.......................	...................	.............................................................	0	6606	0.738018
KC774389.1	...................	.......................	...................	.............................................................	0	6606	0.738018
KC774388.1	...................	.......................	...................	.............................................................	0	6606	0.738018
KC774384.1	...................	.......................	...................	.............................................................	0	6606	0.738018
KC774378.1	...................	.......................	...................	.............................................................	0	6606	0.738018
MK534572.1	...................	.......................	...................	.............................................................	0	6606	0.738018
KC510658.1	...................	.......................	...................	.............................................................	0	6606	0.738018
OM669673.1	...................	.......................	...................	.............................................................	0	6606	0.738018
KR152339.1	...................	.......................	...................	.............................................................	0	6606	0.738018
GU815701.1	...................	.......................	...................	.............................................................	0	6606	0.738018
GU815582.1	...................	.......................	...................	.............................................................	0	6606	0.738018
GU815612.1	...................	.......................	...................	.............................................................	0	6606	0.738018
GU815610.1	...................	.......................	...................	.............................................................	0	6606	0.738018
GU815580.1	...................	.......................	...................	.............................................................	0	6606	0.738018
GU815587.1	...................	.......................	...................	.............................................................	0	6606	0.738018
GU815605.1	...................	.......................	...................	.............................................................	0	6606	0.738018
KJ173397.1	...................	.......................	...................	.............................................................	0	6606	0.738018
KJ173398.1	...................	.......................	...................	.............................................................	0	6606	0.738018
MZ934439.1	...................	.......................	...................	.............................................................	0	6606	0.738018
GU815609.1	...................	.......................	...................	.............................................................	0	6606	0.738018
GU815583.1	...................	.......................	...................	.............................................................	0	6606	0.738018
GU815594.1	...................	.......................	...................	.............................................................	0	6606	0.738018
GU815591.1	...................	.......................	...................	.............................................................	0	6606	0.738018
GU815608.1	...................	.......................	...................	.............................................................	0	6606	0.738018
GU815584.1	...................	.......................	...................	.............................................................	0	6606	0.738018
GU815599.1	...................	.......................	...................	.............................................................	0	6606	0.738018
GU815600.1	...................	.......................	...................	.............................................................	0	6606	0.738018
GU815601.1	...................	.......................	...................	.............................................................	0	6606	0.738018
GU815579.1	...................	.......................	...................	.............................................................	0	6606	0.738018
GU815589.1	...................	.......................	...................	.............................................................	0	6606	0.738018
GU815590.1	...................	.......................	...................	.............................................................	0	6606	0.738018
GU815597.1	...................	.......................	...................	.............................................................	0	6606	0.738018
GU815603.1	...................	.......................	...................	.............................................................	0	6606	0.738018
GU815602.1	...................	.......................	...................	.............................................................	0	6606	0.738018
GU815592.1	...................	.......................	...................	.............................................................	0	6606	0.738018
GU815581.1	...................	.......................	...................	.............................................................	0	6606	0.738018
GU815598.1	...................	.......................	...................	.............................................................	0	6606	0.738018
GU815586.1	...................	.......................	...................	.............................................................	0	6606	0.738018
GU815596.1	...................	.......................	...................	.............................................................	0	6606	0.738018
GU815607.1	...................	.......................	...................	.............................................................	0	6606	0.738018
GU815588.1	...................	.......................	...................	.............................................................	0	6606	0.738018
GU815604.1	...................	.......................	...................	.............................................................	0	6606	0.738018
GU815611.1	...................	.......................	...................	.............................................................	0	6606	0.738018
GU815585.1	...................	.......................	...................	.............................................................	0	6606	0.738018
GU815593.1	...................	.......................	...................	.............................................................	0	6606	0.738018
GU815595.1	...................	.......................	...................	.............................................................	0	6606	0.738018
GU815606.1	...................	.......................	...................	.............................................................	0	6606	0.738018
GU815613.1	...................	.......................	...................	.............................................................	0	6606	0.738018
GU815614.1	...................	.......................	...................	.............................................................	0	6606	0.738018
GU815704.1	...................	.......................	...................	.............................................................	0	6606	0.738018
GU815694.1	...................	.......................	...................	.............................................................	0	6606	0.738018
GU815695.1	...................	.......................	...................	.............................................................	0	6606	0.738018
GU815705.1	...................	.......................	...................	.............................................................	0	6606	0.738018
GU815709.1	...................	.......................	...................	.............................................................	0	6606	0.738018
GU815696.1	...................	.......................	...................	.............................................................	0	6606	0.738018
GU815684.1	...................	.......................	...................	.............................................................	0	6606	0.738018
GU815692.1	...................	.......................	...................	.............................................................	0	6606	0.738018
GU815679.1	...................	.......................	...................	.............................................................	0	6606	0.738018
GU815685.1	...................	.......................	...................	.............................................................	0	6606	0.738018
GU815688.1	...................	.......................	...................	.............................................................	0	6606	0.738018
GU815700.1	...................	.......................	...................	.............................................................	0	6606	0.738018
GU815683.1	...................	.......................	...................	.............................................................	0	6606	0.738018
GU815703.1	...................	.......................	...................	.............................................................	0	6606	0.738018
GU815681.1	...................	.......................	...................	.............................................................	0	6606	0.738018
GU815687.1	...................	.......................	...................	.............................................................	0	6606	0.738018
GU815686.1	...................	.......................	...................	.............................................................	0	6606	0.738018
GU815689.1	...................	.......................	...................	.............................................................	0	6606	0.738018
GU815691.1	...................	.......................	...................	.............................................................	0	6606	0.738018
GU815693.1	...................	.......................	...................	.............................................................	0	6606	0.738018
GU815697.1	...................	.......................	...................	.............................................................	0	6606	0.738018
GU815698.1	...................	.......................	...................	.............................................................	0	6606	0.738018
GU815708.1	...................	.......................	...................	.............................................................	0	6606	0.738018
GU815702.1	...................	.......................	...................	.............................................................	0	6606	0.738018
GU815682.1	...................	.......................	...................	.............................................................	0	6606	0.738018
GU815690.1	...................	.......................	...................	.............................................................	0	6606	0.738018
KC774363.1	...................	.......................	...................	.............................................................	0	6606	0.738018
KC774387.1	...................	.......................	...................	.............................................................	0	6606	0.738018
GU815773.1	...................	.......................	...................	.............................................................	0	6606	0.738018
GU815779.1	...................	.......................	...................	.............................................................	0	6606	0.738018
GU815774.1	...................	.......................	...................	.............................................................	0	6606	0.738018
GU815772.1	...................	.......................	...................	.............................................................	0	6606	0.738018
GU815781.1	...................	.......................	...................	.............................................................	0	6606	0.738018
GU815782.1	...................	.......................	...................	.............................................................	0	6606	0.738018
JQ801514.1	...................	.......................	...................	.............................................................	0	6606	0.738018
MF674512.1	...................	.......................	...................	.............................................................	0	6606	0.738018
GU815763.1	...................	.......................	...................	.............................................................	0	6606	0.738018
GU815758.1	...................	.......................	...................	.............................................................	0	6606	0.738018
GU815755.1	...................	.......................	...................	.............................................................	0	6606	0.738018
GU815761.1	...................	.......................	...................	.............................................................	0	6606	0.738018
GU815764.1	...................	.......................	...................	.............................................................	0	6606	0.738018
GU815751.1	...................	.......................	...................	.............................................................	0	6606	0.738018
GU815753.1	...................	.......................	...................	.............................................................	0	6606	0.738018
GU815754.1	...................	.......................	...................	.............................................................	0	6606	0.738018
GU815757.1	...................	.......................	...................	.............................................................	0	6606	0.738018
GU815765.1	...................	.......................	...................	.............................................................	0	6606	0.738018
GU815760.1	...................	.......................	...................	.............................................................	0	6606	0.738018
GU815770.1	...................	.......................	...................	.............................................................	0	6606	0.738018
GU815756.1	...................	.......................	...................	.............................................................	0	6606	0.738018
GU815759.1	...................	.......................	...................	.............................................................	0	6606	0.738018
GU815769.1	...................	.......................	...................	.............................................................	0	6606	0.738018
GU815750.1	...................	.......................	...................	.............................................................	0	6606	0.738018
GU815762.1	...................	.......................	...................	.............................................................	0	6606	0.738018
GU815766.1	...................	.......................	...................	.............................................................	0	6606	0.738018
GU815767.1	...................	.......................	...................	.............................................................	0	6606	0.738018
GU815768.1	...................	.......................	...................	.............................................................	0	6606	0.738018
GU815771.1	...................	.......................	...................	.............................................................	0	6606	0.738018
GU815752.1	...................	.......................	...................	.............................................................	0	6606	0.738018
MF674503.1	...................	.......................	...................	.............................................................	0	6606	0.738018
OM669661.1	...................	.......................	...................	.............................................................	0	6606	0.738018
KX276777.1	...................	.......................	...................	.............................................................	0	6606	0.738018
GU815707.1	...................	.......................	...................	.............................................................	0	6606	0.738018
GU815706.1	...................	.......................	...................	.............................................................	0	6606	0.738018
GU815699.1	...................	.......................	...................	.............................................................	0	6606	0.738018
GU815710.1	...................	.......................	...................	.............................................................	0	6606	0.738018
GU815711.1	...................	.......................	...................	.............................................................	0	6606	0.738018
GU815712.1	...................	.......................	...................	.............................................................	0	6606	0.738018
GU332700.1	...................	.......................	...................	.............................................................	0	6606	0.738018
GU332690.1	...................	.......................	...................	.............................................................	0	6606	0.738018
JX026886.1	...................	.......................	...................	.............................................................	0	6606	0.738018
FJ386669.1	...................	.......................	...................	.............................................................	0	6606	0.738018
FJ032354.1	...................	.......................	...................	.............................................................	0	6606	0.738018
FJ562316.1	...................	.......................	...................	.............................................................	0	6606	0.738018
KJ803768.1	...................	.......................	...................	.............................................................	0	6606	0.738018
GQ377610.1	...................	.......................	...................	.............................................................	0	6606	0.738018
JX504532.1	...................	.......................	...................	.............................................................	0	6606	0.738018
FJ562224.1	...................	.......................	...................	.............................................................	0	6606	0.738018
FJ562231.1	...................	.......................	...................	.............................................................	0	6606	0.738018
FJ562253.1	...................	.......................	...................	.............................................................	0	6606	0.738018
MG571331.1	...................	.......................	...................	.............................................................	0	6606	0.738018
MG571367.1	...................	.......................	...................	.............................................................	0	6606	0.738018
MG571360.1	...................	.......................	...................	.............................................................	0	6606	0.738018
OM669653.1	...................	.......................	...................	.............................................................	0	6606	0.738018
OM669626.1	...................	.......................	...................	.............................................................	0	6606	0.738018
MG571341.1	...................	.......................	...................	.............................................................	0	6606	0.738018
JX870001.1	...................	.......................	...................	.............................................................	0	6606	0.738018
JX026883.1	...................	.......................	...................	.............................................................	0	6606	0.738018
MG571361.1	...................	.......................	...................	.............................................................	0	6606	0.738018
FJ386668.1	...................	.......................	...................	.............................................................	0	6606	0.738018
KC510657.1	...................	.......................	...................	.............................................................	0	6606	0.738018
GQ377542.1	...................	.......................	...................	.............................................................	0	6606	0.738018
FJ032349.1	...................	.......................	...................	.............................................................	0	6606	0.738018
FJ562234.1	...................	.......................	...................	.............................................................	0	6606	0.738018
MK534691.1	...................	.......................	...................	.............................................................	0	6606	0.738018
KC774377.1	...................	.......................	...................	.............................................................	0	6606	0.738018
FJ386600.1	...................	.......................	...................	.............................................................	0	6606	0.738018
OM669654.1	...................	.......................	...................	.............................................................	0	6606	0.738018
OM669573.1	...................	.......................	...................	.............................................................	0	6606	0.738018
MF674422.1	...................	.......................	...................	.............................................................	0	6606	0.738018
KY881850.1	...................	.......................	...................	.............................................................	0	6606	0.738018
KY881785.1	...................	.......................	...................	.............................................................	0	6606	0.738018
KY881783.1	...................	.......................	...................	.............................................................	0	6606	0.738018
KY881796.1	...................	.......................	...................	.............................................................	0	6606	0.738018
KY881789.1	...................	.......................	...................	.............................................................	0	6606	0.738018
KY881799.1	...................	.......................	...................	.............................................................	0	6606	0.738018
KY881797.1	...................	.......................	...................	.............................................................	0	6606	0.738018
KY881798.1	...................	.......................	...................	.............................................................	0	6606	0.738018
KY881781.1	...................	.......................	...................	.............................................................	0	6606	0.738018
KY881808.1	...................	.......................	...................	.............................................................	0	6606	0.738018
KY881794.1	...................	.......................	...................	.............................................................	0	6606	0.738018
KY881795.1	...................	.......................	...................	.............................................................	0	6606	0.738018
KY881801.1	...................	.......................	...................	.............................................................	0	6606	0.738018
KY881780.1	...................	.......................	...................	.............................................................	0	6606	0.738018
KY881787.1	...................	.......................	...................	.............................................................	0	6606	0.738018
KY881790.1	...................	.......................	...................	.............................................................	0	6606	0.738018
KY881793.1	...................	.......................	...................	.............................................................	0	6606	0.738018
KY881791.1	...................	.......................	...................	.............................................................	0	6606	0.738018
KY881782.1	...................	.......................	...................	.............................................................	0	6606	0.738018
OM669598.1	...................	.......................	...................	.............................................................	0	6606	0.738018
KJ173372.1	...................	.......................	...................	.............................................................	0	6606	0.738018
KX276773.1	...................	.......................	...................	.............................................................	0	6606	0.738018
GQ924631.1	...................	.......................	...................	.............................................................	0	6606	0.738018
KJ410490.1	...................	.......................	...................	.............................................................	0	6606	0.738018
KM392082.1	...................	.......................	...................	.............................................................	0	6606	0.738018
KJ173362.1	...................	.......................	...................	.............................................................	0	6606	0.738018
MK052965.1	...................	.......................	...................	.............................................................	0	6606	0.738018
OM669665.1	...................	.......................	...................	.............................................................	0	6606	0.738018
OM669666.1	...................	.......................	...................	.............................................................	0	6606	0.738018
KC774416.1	...................	.......................	...................	.............................................................	0	6606	0.738018
KC774382.1	...................	.......................	...................	.............................................................	0	6606	0.738018
KC774380.1	...................	.......................	...................	.............................................................	0	6606	0.738018
KC774392.1	...................	.......................	...................	.............................................................	0	6606	0.738018
KC774390.1	...................	.......................	...................	.............................................................	0	6606	0.738018
KC774417.1	...................	.......................	...................	.............................................................	0	6606	0.738018
KC774402.1	...................	.......................	...................	.............................................................	0	6606	0.738018
KC774391.1	...................	.......................	...................	.............................................................	0	6606	0.738018
KC774379.1	...................	.......................	...................	.............................................................	0	6606	0.738018
KC774385.1	...................	.......................	...................	.............................................................	0	6606	0.738018
JQ040157.1	...................	.......................	...................	.............................................................	0	6606	0.738018
MF674391.1	...................	.......................	...................	.............................................................	0	6606	0.738018
OM669672.1	...................	.......................	...................	.............................................................	0	6606	0.738018
MG571321.1	...................	.......................	...................	.............................................................	0	6606	0.738018
KC774376.1	...................	.......................	...................	.............................................................	0	6606	0.738018
KJ803752.1	...................	.......................	...................	.............................................................	0	6606	0.738018
KJ803783.1	...................	.......................	...................	.............................................................	0	6606	0.738018
KJ803781.1	...................	.......................	...................	.............................................................	0	6606	0.738018
MG571334.1	...................	.......................	...................	.............................................................	0	6606	0.738018
MG571373.1	...................	.......................	...................	.............................................................	0	6606	0.738018
OM669662.1	...................	.......................	...................	.............................................................	0	6606	0.738018
JQ801516.1	...................	.......................	...................	.............................................................	0	6606	0.738018
OM669664.1	...................	.......................	...................	.............................................................	0	6606	0.738018
OM669670.1	...................	.......................	...................	.............................................................	0	6606	0.738018
OM669582.1	...................	.......................	...................	.............................................................	0	6606	0.738018
OM669623.1	...................	.......................	...................	.............................................................	0	6606	0.738018
JX504543.1	...................	.......................	...................	.............................................................	0	6606	0.738018
KC510642.1	...................	.......................	...................	.............................................................	0	6606	0.738018
KC510641.1	...................	.......................	...................	.............................................................	0	6606	0.738018
KC510649.1	...................	.......................	...................	.............................................................	0	6606	0.738018
KJ173339.1	...................	.......................	...................	.............................................................	0	6606	0.738018
KJ173340.1	...................	.......................	...................	.............................................................	0	6606	0.738018
KJ803756.1	...................	.......................	...................	.............................................................	0	6606	0.738018
KY470955.1	...................	.......................	...................	.............................................................	0	6606	0.738018
KY470960.1	...................	.......................	...................	.............................................................	0	6606	0.738018
KY470961.1	...................	.......................	...................	.............................................................	0	6606	0.738018
KY470956.1	...................	.......................	...................	.............................................................	0	6606	0.738018
MW310263.1	...................	.......................	...................	.............................................................	0	6606	0.738018
MW310261.1	...................	.......................	...................	.............................................................	0	6606	0.738018
MG571348.1	...................	.......................	...................	.............................................................	0	6606	0.738018
MW310264.1	...................	.......................	...................	.............................................................	0	6606	0.738018
KJ803808.1	...................	.......................	...................	.............................................................	0	6606	0.738018
KX276808.1	...................	.......................	...................	.............................................................	0	6606	0.738018
FJ787477.1	...................	.......................	...................	.............................................................	0	6606	0.738018
OM669619.1	...................	.......................	...................	.............................................................	0	6606	0.738018
MG571338.1	...................	.......................	...................	.............................................................	0	6606	0.738018
OM669589.1	...................	.......................	...................	.............................................................	0	6606	0.738018
OM669603.1	...................	.......................	...................	.............................................................	0	6606	0.738018
FJ562236.1	...................	.......................	...................	.............................................................	0	6606	0.738018
KJ173384.1	...................	.......................	...................	.............................................................	0	6606	0.738018
GQ377561.1	...................	.......................	...................	.............................................................	0	6606	0.738018
JX429901.1	...................	.......................	...................	.............................................................	0	6606	0.738018
KJ173377.1	...................	.......................	...................	.............................................................	0	6606	0.738018
KJ173383.1	...................	.......................	...................	.............................................................	0	6606	0.738018
KJ173380.1	...................	.......................	...................	.............................................................	0	6606	0.738018
KJ173379.1	...................	.......................	...................	.............................................................	0	6606	0.738018
MG571340.1	...................	.......................	...................	.............................................................	0	6606	0.738018
KX276803.1	...................	.......................	...................	.............................................................	0	6606	0.738018
MG571333.1	...................	.......................	...................	.............................................................	0	6606	0.738018
GQ924605.1	...................	.......................	...................	.............................................................	0	6606	0.738018
MK183646.1	...................	.......................	...................	.............................................................	0	6606	0.738018
KM392078.1	...................	.......................	...................	.............................................................	0	6606	0.738018
AB931168.1	...................	.......................	...................	.............................................................	0	6606	0.738018
AB931169.1	...................	.......................	...................	.............................................................	0	6606	0.738018
AB828708.1	...................	.......................	...................	.............................................................	0	6606	0.738018
LC461174.1	...................	.......................	...................	.............................................................	0	6606	0.738018
LC461175.1	...................	.......................	...................	.............................................................	0	6606	0.738018
LC603637.1	...................	.......................	...................	.............................................................	0	6606	0.738018
KP341007.1	...................	.......................	...................	.............................................................	0	6606	0.738018
KP659219.1	...................	.......................	...................	.............................................................	0	6606	0.738018
KP659221.1	...................	.......................	...................	.............................................................	0	6606	0.738018
KX276792.1	...................	.......................	...................	.............................................................	0	6606	0.738018
KM392080.1	...................	.......................	...................	.............................................................	0	6606	0.738018
KX276796.1	...................	.......................	...................	.............................................................	0	6606	0.738018
KX276797.1	...................	.......................	...................	.............................................................	0	6606	0.738018
KX276813.1	...................	.......................	...................	.............................................................	0	6606	0.738018
OM669581.1	...................	.......................	...................	.............................................................	0	6606	0.738018
OM669592.1	...................	.......................	...................	.............................................................	0	6606	0.738018
JQ040126.1	...................	.......................	...................	.............................................................	0	6606	0.738018
MG571343.1	...................	.......................	...................	.............................................................	0	6606	0.738018
KJ803795.1	...................	.......................	...................	.............................................................	0	6606	0.738018
KM392075.1	...................	.......................	...................	.............................................................	0	6606	0.738018
KX276819.1	...................	.......................	...................	.............................................................	0	6606	0.738018
GQ924641.1	...................	.......................	...................	.............................................................	0	6606	0.738018
KX276858.1	...................	.......................	...................	.............................................................	0	6606	0.738018
HM011499.1	...................	.......................	...................	.............................................................	0	6606	0.738018
KX276795.1	...................	.......................	...................	.............................................................	0	6606	0.738018
HM011477.1	...................	.......................	...................	.............................................................	0	6606	0.738018
KX276816.1	...................	.......................	...................	.............................................................	0	6606	0.738018
KX276779.1	...................	.......................	...................	.............................................................	0	6606	0.738018
HM011483.1	...................	.......................	...................	.............................................................	0	6606	0.738018
KX276794.1	...................	.......................	...................	.............................................................	0	6606	0.738018
JQ027313.1	...................	.......................	...................	.............................................................	0	6606	0.738018
KX276802.1	...................	.......................	...................	.............................................................	0	6606	0.738018
KX276800.1	...................	.......................	...................	.............................................................	0	6606	0.738018
KX276787.1	...................	.......................	...................	.............................................................	0	6606	0.738018
KX276789.1	...................	.......................	...................	.............................................................	0	6606	0.738018
MK534601.1	...................	.......................	...................	.............................................................	0	6606	0.738018
GQ924610.1	...................	.......................	...................	.............................................................	0	6606	0.738018
KJ173369.1	...................	.......................	...................	.............................................................	0	6606	0.738018
KJ173425.1	...................	.......................	...................	.............................................................	0	6606	0.738018
GU815562.1	...................	.......................	...................	.............................................................	0	6606	0.738018
GU815563.1	...................	.......................	...................	.............................................................	0	6606	0.738018
GU815575.1	...................	.......................	...................	.............................................................	0	6606	0.738018
GU815548.1	...................	.......................	...................	.............................................................	0	6606	0.738018
GU815552.1	...................	.......................	...................	.............................................................	0	6606	0.738018
GU815564.1	...................	.......................	...................	.............................................................	0	6606	0.738018
GU815551.1	...................	.......................	...................	.............................................................	0	6606	0.738018
GU815553.1	...................	.......................	...................	.............................................................	0	6606	0.738018
GU815556.1	...................	.......................	...................	.............................................................	0	6606	0.738018
GU815566.1	...................	.......................	...................	.............................................................	0	6606	0.738018
GU815568.1	...................	.......................	...................	.............................................................	0	6606	0.738018
GU815555.1	...................	.......................	...................	.............................................................	0	6606	0.738018
GU815557.1	...................	.......................	...................	.............................................................	0	6606	0.738018
GU815550.1	...................	.......................	...................	.............................................................	0	6606	0.738018
GU815561.1	...................	.......................	...................	.............................................................	0	6606	0.738018
GU815569.1	...................	.......................	...................	.............................................................	0	6606	0.738018
GU815559.1	...................	.......................	...................	.............................................................	0	6606	0.738018
GU815565.1	...................	.......................	...................	.............................................................	0	6606	0.738018
GU815567.1	...................	.......................	...................	.............................................................	0	6606	0.738018
GU815576.1	...................	.......................	...................	.............................................................	0	6606	0.738018
GU815560.1	...................	.......................	...................	.............................................................	0	6606	0.738018
KJ173352.1	...................	.......................	...................	.............................................................	0	6606	0.738018
KJ173354.1	...................	.......................	...................	.............................................................	0	6606	0.738018
FJ386584.1	...................	.......................	...................	.............................................................	0	6606	0.738018
KJ803802.1	...................	.......................	...................	.............................................................	0	6606	0.738018
LC456127.1	...................	.......................	...................	.............................................................	0	6606	0.738018
KJ173422.1	...................	.......................	...................	.............................................................	0	6606	0.738018
KJ173423.1	...................	.......................	...................	.............................................................	0	6606	0.738018
MF674450.1	...................	.......................	...................	.............................................................	0	6606	0.738018
GQ924627.1	...................	.......................	...................	.............................................................	0	6606	0.738018
KC774399.1	...................	.......................	...................	.............................................................	0	6606	0.738018
MF674427.1	...................	.......................	...................	.............................................................	0	6606	0.738018
MZ671239.1	...................	.......................	...................	.............................................................	0	6606	0.738018
MF674449.1	...................	.......................	...................	.............................................................	0	6606	0.738018
GQ924608.1	...................	.......................	...................	.............................................................	0	6606	0.738018
KJ410516.1	...................	.......................	...................	.............................................................	0	6606	0.738018
GQ377547.1	...................	.......................	...................	.............................................................	0	6606	0.738018
MG571369.1	...................	.......................	...................	.............................................................	0	6606	0.738018
JQ040171.1	...................	.......................	...................	.............................................................	0	6606	0.738018
JQ801479.1	...................	.......................	...................	.............................................................	0	6606	0.738018
MG571322.1	...................	.......................	...................	.............................................................	0	6606	0.738018
GU815669.1	...................	.......................	...................	.............................................................	0	6606	0.738018
GU815667.1	...................	.......................	...................	.............................................................	0	6606	0.738018
GU815654.1	...................	.......................	...................	.............................................................	0	6606	0.738018
GU815676.1	...................	.......................	...................	.............................................................	0	6606	0.738018
GU815668.1	...................	.......................	...................	.............................................................	0	6606	0.738018
GU815664.1	...................	.......................	...................	.............................................................	0	6606	0.738018
GU815659.1	...................	.......................	...................	.............................................................	0	6606	0.738018
GU815677.1	...................	.......................	...................	.............................................................	0	6606	0.738018
GU815672.1	...................	.......................	...................	.............................................................	0	6606	0.738018
GU815661.1	...................	.......................	...................	.............................................................	0	6606	0.738018
GU815656.1	...................	.......................	...................	.............................................................	0	6606	0.738018
GU815653.1	...................	.......................	...................	.............................................................	0	6606	0.738018
GU815650.1	...................	.......................	...................	.............................................................	0	6606	0.738018
GU815651.1	...................	.......................	...................	.............................................................	0	6606	0.738018
GU815662.1	...................	.......................	...................	.............................................................	0	6606	0.738018
GU815648.1	...................	.......................	...................	.............................................................	0	6606	0.738018
GU815658.1	...................	.......................	...................	.............................................................	0	6606	0.738018
GU815663.1	...................	.......................	...................	.............................................................	0	6606	0.738018
GU815673.1	...................	.......................	...................	.............................................................	0	6606	0.738018
GU815647.1	...................	.......................	...................	.............................................................	0	6606	0.738018
GU815649.1	...................	.......................	...................	.............................................................	0	6606	0.738018
GU815652.1	...................	.......................	...................	.............................................................	0	6606	0.738018
GU815660.1	...................	.......................	...................	.............................................................	0	6606	0.738018
GU815665.1	...................	.......................	...................	.............................................................	0	6606	0.738018
GU815666.1	...................	.......................	...................	.............................................................	0	6606	0.738018
GU815674.1	...................	.......................	...................	.............................................................	0	6606	0.738018
GU815675.1	...................	.......................	...................	.............................................................	0	6606	0.738018
GU815646.1	...................	.......................	...................	.............................................................	0	6606	0.738018
GU815623.1	...................	.......................	...................	.............................................................	0	6606	0.738018
GU815641.1	...................	.......................	...................	.............................................................	0	6606	0.738018
GU815629.1	...................	.......................	...................	.............................................................	0	6606	0.738018
GU815630.1	...................	.......................	...................	.............................................................	0	6606	0.738018
GU815618.1	...................	.......................	...................	.............................................................	0	6606	0.738018
GU815637.1	...................	.......................	...................	.............................................................	0	6606	0.738018
GU815631.1	...................	.......................	...................	.............................................................	0	6606	0.738018
GU815628.1	...................	.......................	...................	.............................................................	0	6606	0.738018
GU815636.1	...................	.......................	...................	.............................................................	0	6606	0.738018
GU815620.1	...................	.......................	...................	.............................................................	0	6606	0.738018
GU815621.1	...................	.......................	...................	.............................................................	0	6606	0.738018
GU815624.1	...................	.......................	...................	.............................................................	0	6606	0.738018
GU815633.1	...................	.......................	...................	.............................................................	0	6606	0.738018
GU815638.1	...................	.......................	...................	.............................................................	0	6606	0.738018
GU815644.1	...................	.......................	...................	.............................................................	0	6606	0.738018
GU815645.1	...................	.......................	...................	.............................................................	0	6606	0.738018
GU815626.1	...................	.......................	...................	.............................................................	0	6606	0.738018
GU815632.1	...................	.......................	...................	.............................................................	0	6606	0.738018
GU815643.1	...................	.......................	...................	.............................................................	0	6606	0.738018
MG571328.1	...................	.......................	...................	.............................................................	0	6606	0.738018
MG571344.1	...................	.......................	...................	.............................................................	0	6606	0.738018
OM669625.1	...................	.......................	...................	.............................................................	0	6606	0.738018
KJ173366.1	...................	.......................	...................	.............................................................	0	6606	0.738018
KJ173365.1	...................	.......................	...................	.............................................................	0	6606	0.738018
JX429908.1	...................	.......................	...................	.............................................................	0	6606	0.738018
MK534603.1	...................	.......................	...................	.............................................................	0	6606	0.738018
MK534693.1	...................	.......................	...................	.............................................................	0	6606	0.738018
MK534683.1	...................	.......................	...................	.............................................................	0	6606	0.738018
MK534710.1	...................	.......................	...................	.............................................................	0	6606	0.738018
MK534684.1	...................	.......................	...................	.............................................................	0	6606	0.738018
GQ377566.1	...................	.......................	...................	.............................................................	0	6606	0.738018
GQ377568.1	...................	.......................	...................	.............................................................	0	6606	0.738018
GQ377588.1	...................	.......................	...................	.............................................................	0	6606	0.738018
GQ377569.1	...................	.......................	...................	.............................................................	0	6606	0.738018
GQ377537.1	...................	.......................	...................	.............................................................	0	6606	0.738018
KC774411.1	...................	.......................	...................	.............................................................	0	6606	0.738018
KC774371.1	...................	.......................	...................	.............................................................	0	6606	0.738018
FJ386684.1	...................	.......................	...................	.............................................................	0	6606	0.738018
KJ173359.1	...................	.......................	...................	.............................................................	0	6606	0.738018
KJ173409.1	...................	.......................	...................	.............................................................	0	6606	0.738018
KJ173410.1	...................	.......................	...................	.............................................................	0	6606	0.738018
KC774394.1	...................	.......................	...................	.............................................................	0	6606	0.738018
KJ173405.1	...................	.......................	...................	.............................................................	0	6606	0.738018
KJ173406.1	...................	.......................	...................	.............................................................	0	6606	0.738018
KJ173399.1	...................	.......................	...................	.............................................................	0	6606	0.738018
KJ173400.1	...................	.......................	...................	.............................................................	0	6606	0.738018
GQ924653.1	...................	.......................	...................	.............................................................	0	6606	0.738018
MZ675785.1	...................	.......................	...................	.............................................................	0	6606	0.738018
KC510660.1	...................	.......................	...................	.............................................................	0	6606	0.738018
GQ924603.1	...................	.......................	...................	.............................................................	0	6606	0.738018
KC774401.1	...................	.......................	...................	.............................................................	0	6606	0.738018
FJ386655.1	...................	.......................	...................	.............................................................	0	6606	0.738018
JX429902.1	...................	.......................	...................	.............................................................	0	6606	0.738018
JF412801.1	...................	.......................	...................	.............................................................	0	6606	0.738018
KJ173407.1	...................	.......................	...................	.............................................................	0	6606	0.738018
KJ173408.1	...................	.......................	...................	.............................................................	0	6606	0.738018
JF899335.1	...................	.......................	...................	.............................................................	0	6606	0.738018
KC774409.1	...................	.......................	...................	.............................................................	0	6606	0.738018
KJ173414.1	...................	.......................	...................	.............................................................	0	6606	0.738018
KP341008.1	...................	.......................	...................	.............................................................	0	6606	0.738018
GQ205440.1	...................	.......................	...................	.............................................................	0	6606	0.738018
JQ688405.1	...................	.......................	...................	.............................................................	0	6606	0.738018
GQ377635.1	...................	.......................	...................	.............................................................	0	6606	0.738018
KC774419.1	...................	.......................	...................	.............................................................	0	6606	0.738018
KC774364.1	...................	.......................	...................	.............................................................	0	6606	0.738018
KC774178.1	...................	.......................	...................	.............................................................	0	6606	0.738018
KJ173320.1	...................	.......................	...................	.............................................................	0	6606	0.738018
KJ173322.1	...................	.......................	...................	.............................................................	0	6606	0.738018
MK534575.1	...................	.......................	...................	.............................................................	0	6606	0.738018
KJ173298.1	...................	.......................	...................	.............................................................	0	6606	0.738018
KJ803801.1	...................	.......................	...................	.............................................................	0	6606	0.738018
KJ173358.1	...................	.......................	...................	.............................................................	0	6606	0.738018
MK534614.1	...................	.......................	...................	.............................................................	0	6606	0.738018
KJ173279.1	...................	.......................	...................	.............................................................	0	6606	0.738018
KJ173341.1	...................	.......................	...................	.............................................................	0	6606	0.738018
KJ173342.1	...................	.......................	...................	.............................................................	0	6606	0.738018
MK534576.1	...................	.......................	...................	.............................................................	0	6606	0.738018
MK534704.1	...................	.......................	...................	.............................................................	0	6606	0.738018
KJ803791.1	...................	.......................	...................	.............................................................	0	6606	0.738018
MT645056.1	...................	.......................	...................	.............................................................	0	6606	0.738018
KJ803803.1	...................	.......................	...................	.............................................................	0	6606	0.738018
KJ803817.1	...................	.......................	...................	.............................................................	0	6606	0.738018
MK534712.1	...................	.......................	...................	.............................................................	0	6606	0.738018
MK534676.1	...................	.......................	...................	.............................................................	0	6606	0.738018
JQ801524.1	...................	.......................	...................	.............................................................	0	6606	0.738018
MK534660.1	...................	.......................	...................	.............................................................	0	6606	0.738018
MK534591.1	...................	.......................	...................	.............................................................	0	6606	0.738018
KJ803807.1	...................	.......................	...................	.............................................................	0	6606	0.738018
FJ386646.1	...................	.......................	...................	.............................................................	0	6606	0.738018
MK534587.1	...................	.......................	...................	.............................................................	0	6606	0.738018
KX276815.1	...................	.......................	...................	.............................................................	0	6606	0.738018
LC535910.1	...................	.......................	...................	.............................................................	0	6606	0.738018
MK534558.1	...................	.......................	...................	.............................................................	0	6606	0.738018
MK534736.1	...................	.......................	...................	.............................................................	0	6606	0.738018
MK534685.1	...................	.......................	...................	.............................................................	0	6606	0.738018
MK534697.1	...................	.......................	...................	.............................................................	0	6606	0.738018
MZ439541.1	...................	.......................	...................	.............................................................	0	6606	0.738018
MZ439550.1	...................	.......................	...................	.............................................................	0	6606	0.738018
MZ439544.1	...................	.......................	...................	.............................................................	0	6606	0.738018
MZ439538.1	...................	.......................	...................	.............................................................	0	6606	0.738018
MZ439547.1	...................	.......................	...................	.............................................................	0	6606	0.738018
MZ439539.1	...................	.......................	...................	.............................................................	0	6606	0.738018
MZ439549.1	...................	.......................	...................	.............................................................	0	6606	0.738018
MZ439546.1	...................	.......................	...................	.............................................................	0	6606	0.738018
MZ439532.1	...................	.......................	...................	.............................................................	0	6606	0.738018
MZ439542.1	...................	.......................	...................	.............................................................	0	6606	0.738018
MZ439540.1	...................	.......................	...................	.............................................................	0	6606	0.738018
MZ439548.1	...................	.......................	...................	.............................................................	0	6606	0.738018
MZ439543.1	...................	.......................	...................	.............................................................	0	6606	0.738018
MZ439545.1	...................	.......................	...................	.............................................................	0	6606	0.738018
MZ439551.1	...................	.......................	...................	.............................................................	0	6606	0.738018
MZ439522.1	...................	.......................	...................	.............................................................	0	6606	0.738018
MZ439523.1	...................	.......................	...................	.............................................................	0	6606	0.738018
MZ439527.1	...................	.......................	...................	.............................................................	0	6606	0.738018
MZ439524.1	...................	.......................	...................	.............................................................	0	6606	0.738018
MZ439529.1	...................	.......................	...................	.............................................................	0	6606	0.738018
MZ439530.1	...................	.......................	...................	.............................................................	0	6606	0.738018
MZ439536.1	...................	.......................	...................	.............................................................	0	6606	0.738018
MZ439537.1	...................	.......................	...................	.............................................................	0	6606	0.738018
MZ439533.1	...................	.......................	...................	.............................................................	0	6606	0.738018
MZ439531.1	...................	.......................	...................	.............................................................	0	6606	0.738018
MZ439535.1	...................	.......................	...................	.............................................................	0	6606	0.738018
MZ439525.1	...................	.......................	...................	.............................................................	0	6606	0.738018
MZ439528.1	...................	.......................	...................	.............................................................	0	6606	0.738018
MZ439534.1	...................	.......................	...................	.............................................................	0	6606	0.738018
MZ439526.1	...................	.......................	...................	.............................................................	0	6606	0.738018
MZ439521.1	...................	.......................	...................	.............................................................	0	6606	0.738018
MZ439520.1	...................	.......................	...................	.............................................................	0	6606	0.738018
MZ439517.1	...................	.......................	...................	.............................................................	0	6606	0.738018
MZ439519.1	...................	.......................	...................	.............................................................	0	6606	0.738018
LC064366.1	...................	.......................	...................	.............................................................	0	6606	0.738018
LC057377.1	...................	.......................	...................	.............................................................	0	6606	0.738018
MF621878.1	...................	.......................	...................	.............................................................	0	6606	0.738018
LC064380.1	...................	.......................	...................	.............................................................	0	6606	0.738018
GQ924626.1	...................	.......................	...................	.............................................................	0	6606	0.738018
LC064372.1	...................	.......................	...................	.............................................................	0	6606	0.738018
LC064376.1	...................	.......................	...................	.............................................................	0	6606	0.738018
MF674439.1	...................	.......................	...................	.............................................................	0	6606	0.738018
MF674436.1	...................	.......................	...................	.............................................................	0	6606	0.738018
MF674440.1	...................	.......................	...................	.............................................................	0	6606	0.738018
MF674448.1	...................	.......................	...................	.............................................................	0	6606	0.738018
MF674478.1	...................	.......................	...................	.............................................................	0	6606	0.738018
LC064371.1	...................	.......................	...................	.............................................................	0	6606	0.738018
LC064367.1	...................	.......................	...................	.............................................................	0	6606	0.738018
LC064368.1	...................	.......................	...................	.............................................................	0	6606	0.738018
LC064378.1	...................	.......................	...................	.............................................................	0	6606	0.738018
MK534696.1	...................	.......................	...................	.............................................................	0	6606	0.738018
MF674446.1	...................	.......................	...................	.............................................................	0	6606	0.738018
MF674407.1	...................	.......................	...................	.............................................................	0	6606	0.738018
LC535943.1	...................	.......................	...................	.............................................................	0	6606	0.738018
LC535944.1	...................	.......................	...................	.............................................................	0	6606	0.738018
MF674481.1	...................	.......................	...................	.............................................................	0	6606	0.738018
MF674410.1	...................	.......................	...................	.............................................................	0	6606	0.738018
MF674416.1	...................	.......................	...................	.............................................................	0	6606	0.738018
MF674515.1	...................	.......................	...................	.............................................................	0	6606	0.738018
MF674473.1	...................	.......................	...................	.............................................................	0	6606	0.738018
MF674420.1	...................	.......................	...................	.............................................................	0	6606	0.738018
MF674432.1	...................	.......................	...................	.............................................................	0	6606	0.738018
MZ675794.1	...................	.......................	...................	.............................................................	0	6606	0.738018
MN535018.1	...................	.......................	...................	.............................................................	0	6606	0.738018
MZ675807.1	...................	.......................	...................	.............................................................	0	6606	0.738018
MZ675795.1	...................	.......................	...................	.............................................................	0	6606	0.738018
MZ675796.1	...................	.......................	...................	.............................................................	0	6606	0.738018
MZ675797.1	...................	.......................	...................	.............................................................	0	6606	0.738018
MF674392.1	...................	.......................	...................	.............................................................	0	6606	0.738018
MF674461.1	...................	.......................	...................	.............................................................	0	6606	0.738018
MF674385.1	...................	.......................	...................	.............................................................	0	6606	0.738018
MF674419.1	...................	.......................	...................	.............................................................	0	6606	0.738018
MF674479.1	...................	.......................	...................	.............................................................	0	6606	0.738018
MF674406.1	...................	.......................	...................	.............................................................	0	6606	0.738018
MF674459.1	...................	.......................	...................	.............................................................	0	6606	0.738018
MF674466.1	...................	.......................	...................	.............................................................	0	6606	0.738018
MF674505.1	...................	.......................	...................	.............................................................	0	6606	0.738018
MF674415.1	...................	.......................	...................	.............................................................	0	6606	0.738018
LC064369.1	...................	.......................	...................	.............................................................	0	6606	0.738018
LC057378.1	...................	.......................	...................	.............................................................	0	6606	0.738018
LC064381.1	...................	.......................	...................	.............................................................	0	6606	0.738018
MF674443.1	...................	.......................	...................	.............................................................	0	6606	0.738018
MF674499.1	...................	.......................	...................	.............................................................	0	6606	0.738018
MF674491.1	...................	.......................	...................	.............................................................	0	6606	0.738018
MF674447.1	...................	.......................	...................	.............................................................	0	6606	0.738018
MF674493.1	...................	.......................	...................	.............................................................	0	6606	0.738018
LC064373.1	...................	.......................	...................	.............................................................	0	6606	0.738018
MF674421.1	...................	.......................	...................	.............................................................	0	6606	0.738018
MF674424.1	...................	.......................	...................	.............................................................	0	6606	0.738018
MF674397.1	...................	.......................	...................	.............................................................	0	6606	0.738018
MF674497.1	...................	.......................	...................	.............................................................	0	6606	0.738018
MF674460.1	...................	.......................	...................	.............................................................	0	6606	0.738018
MF674470.1	...................	.......................	...................	.............................................................	0	6606	0.738018
MF674445.1	...................	.......................	...................	.............................................................	0	6606	0.738018
LC064377.1	...................	.......................	...................	.............................................................	0	6606	0.738018
MF674382.1	...................	.......................	...................	.............................................................	0	6606	0.738018
MF674496.1	...................	.......................	...................	.............................................................	0	6606	0.738018
MF674508.1	...................	.......................	...................	.............................................................	0	6606	0.738018
MF674394.1	...................	.......................	...................	.............................................................	0	6606	0.738018
MF674507.1	...................	.......................	...................	.............................................................	0	6606	0.738018
MF674453.1	...................	.......................	...................	.............................................................	0	6606	0.738018
FJ349236.1	...................	.......................	...................	.............................................................	0	6606	0.738018
MF674510.1	...................	.......................	...................	.............................................................	0	6606	0.738018
MF674433.1	...................	.......................	...................	.............................................................	0	6606	0.738018
MF674438.1	...................	.......................	...................	.............................................................	0	6606	0.738018
MF674423.1	...................	.......................	...................	.............................................................	0	6606	0.738018
MF674490.1	...................	.......................	...................	.............................................................	0	6606	0.738018
MF674513.1	...................	.......................	...................	.............................................................	0	6606	0.738018
MF674384.1	...................	.......................	...................	.............................................................	0	6606	0.738018
MF674488.1	...................	.......................	...................	.............................................................	0	6606	0.738018
MF674387.1	...................	.......................	...................	.............................................................	0	6606	0.738018
KP341010.1	...................	.......................	...................	.............................................................	0	6606	0.738018
MF674483.1	...................	.......................	...................	.............................................................	0	6606	0.738018
KU234318.1	...................	.......................	...................	.............................................................	0	6606	0.738018
LC535920.1	...................	.......................	...................	.............................................................	0	6606	0.738018
MF674405.1	...................	.......................	...................	.............................................................	0	6606	0.738018
MF674469.1	...................	.......................	...................	.............................................................	0	6606	0.738018
MF674498.1	...................	.......................	...................	.............................................................	0	6606	0.738018
MF674400.1	...................	.......................	...................	.............................................................	0	6606	0.738018
MF674511.1	...................	.......................	...................	.............................................................	0	6606	0.738018
LC064370.1	...................	.......................	...................	.............................................................	0	6606	0.738018
MF674404.1	...................	.......................	...................	.............................................................	0	6606	0.738018
MF674383.1	...................	.......................	...................	.............................................................	0	6606	0.738018
LC063767.1	...................	.......................	...................	.............................................................	0	6606	0.738018
MF674414.1	...................	.......................	...................	.............................................................	0	6606	0.738018
MF674437.1	...................	.......................	...................	.............................................................	0	6606	0.738018
MF674477.1	...................	.......................	...................	.............................................................	0	6606	0.738018
LC535924.1	...................	.......................	...................	.............................................................	0	6606	0.738018
LC535940.1	...................	.......................	...................	.............................................................	0	6606	0.738018
LC535941.1	...................	.......................	...................	.............................................................	0	6606	0.738018
LC535945.1	...................	.......................	...................	.............................................................	0	6606	0.738018
LC064375.1	...................	.......................	...................	.............................................................	0	6606	0.738018
MF674451.1	...................	.......................	...................	.............................................................	0	6606	0.738018
LC535929.1	...................	.......................	...................	.............................................................	0	6606	0.738018
MF674395.1	...................	.......................	...................	.............................................................	0	6606	0.738018
MF674409.1	...................	.......................	...................	.............................................................	0	6606	0.738018
MF674434.1	...................	.......................	...................	.............................................................	0	6606	0.738018
MZ675805.1	...................	.......................	...................	.............................................................	0	6606	0.738018
MZ675806.1	...................	.......................	...................	.............................................................	0	6606	0.738018
MF674413.1	...................	.......................	...................	.............................................................	0	6606	0.738018
MF674393.1	...................	.......................	...................	.............................................................	0	6606	0.738018
MF674401.1	...................	.......................	...................	.............................................................	0	6606	0.738018
MF674456.1	...................	.......................	...................	.............................................................	0	6606	0.738018
MF674500.1	...................	.......................	...................	.............................................................	0	6606	0.738018
MF674482.1	...................	.......................	...................	.............................................................	0	6606	0.738018
MF674452.1	...................	.......................	...................	.............................................................	0	6606	0.738018
AB554017.1	...................	.......................	...................	.............................................................	0	6606	0.738018
KP341012.1	...................	.......................	...................	.............................................................	0	6606	0.738018
AP011092.1	...................	.......................	...................	.............................................................	0	6606	0.738018
KP341009.1	...................	.......................	...................	.............................................................	0	6606	0.738018
AP011085.1	...................	.......................	...................	.............................................................	0	6606	0.738018
AP011096.1	...................	.......................	...................	.............................................................	0	6606	0.738018
KP341013.1	...................	.......................	...................	.............................................................	0	6606	0.738018
GQ924651.1	...................	.......................	...................	.............................................................	0	6606	0.738018
GQ924654.1	...................	.......................	...................	.............................................................	0	6606	0.738018
AP011093.1	...................	.......................	...................	.............................................................	0	6606	0.738018
AP011094.1	...................	.......................	...................	.............................................................	0	6606	0.738018
MT757447.1	...................	.......................	...................	.............................................................	0	6606	0.738018
MT757442.1	...................	.......................	...................	.............................................................	0	6606	0.738018
MT757436.1	...................	.......................	...................	.............................................................	0	6606	0.738018
MT757454.1	...................	.......................	...................	.............................................................	0	6606	0.738018
MT757455.1	...................	.......................	...................	.............................................................	0	6606	0.738018
MT757449.1	...................	.......................	...................	.............................................................	0	6606	0.738018
MT757445.1	...................	.......................	...................	.............................................................	0	6606	0.738018
MT757444.1	...................	.......................	...................	.............................................................	0	6606	0.738018
MT757456.1	...................	.......................	...................	.............................................................	0	6606	0.738018
MT757443.1	...................	.......................	...................	.............................................................	0	6606	0.738018
MT757446.1	...................	.......................	...................	.............................................................	0	6606	0.738018
MT757441.1	...................	.......................	...................	.............................................................	0	6606	0.738018
MT757452.1	...................	.......................	...................	.............................................................	0	6606	0.738018
MT757438.1	...................	.......................	...................	.............................................................	0	6606	0.738018
MT757437.1	...................	.......................	...................	.............................................................	0	6606	0.738018
MT757451.1	...................	.......................	...................	.............................................................	0	6606	0.738018
MT757439.1	...................	.......................	...................	.............................................................	0	6606	0.738018
MT757448.1	...................	.......................	...................	.............................................................	0	6606	0.738018
MT757453.1	...................	.......................	...................	.............................................................	0	6606	0.738018
MT757457.1	...................	.......................	...................	.............................................................	0	6606	0.738018
MK534621.1	...................	.......................	...................	.............................................................	0	6606	0.738018
MN689117.1	...................	.......................	...................	.............................................................	0	6606	0.738018
MK534668.1	...................	.......................	...................	.............................................................	0	6606	0.738018
MK534680.1	...................	.......................	...................	.............................................................	0	6606	0.738018
MK534701.1	...................	.......................	...................	.............................................................	0	6606	0.738018
MK534699.1	...................	.......................	...................	.............................................................	0	6606	0.738018
MK534698.1	...................	.......................	...................	.............................................................	0	6606	0.738018
KX276817.1	...................	.......................	...................	.............................................................	0	6606	0.738018
MZ934429.1	...................	.......................	...................	.............................................................	0	6606	0.738018
GQ924628.1	...................	.......................	...................	.............................................................	0	6606	0.738018
GQ924637.1	...................	.......................	...................	.............................................................	0	6606	0.738018
JQ027316.1	...................	.......................	...................	.............................................................	0	6606	0.738018
GQ924638.1	...................	.......................	...................	.............................................................	0	6606	0.738018
JQ027334.1	...................	.......................	...................	.............................................................	0	6606	0.738018
KX276822.1	...................	.......................	...................	.............................................................	0	6606	0.738018
HM011469.1	...................	.......................	...................	.............................................................	0	6606	0.738018
GQ924635.1	...................	.......................	...................	.............................................................	0	6606	0.738018
GQ924656.1	...................	.......................	...................	.............................................................	0	6606	0.738018
KX276818.1	...................	.......................	...................	.............................................................	0	6606	0.738018
KX276823.1	...................	.......................	...................	.............................................................	0	6606	0.738018
KX276829.1	...................	.......................	...................	.............................................................	0	6606	0.738018
KJ803824.1	...................	.......................	...................	.............................................................	0	6606	0.738018
KX276828.1	...................	.......................	...................	.............................................................	0	6606	0.738018
HM011490.1	...................	.......................	...................	.............................................................	0	6606	0.738018
GQ924621.1	...................	.......................	...................	.............................................................	0	6606	0.738018
MK534626.1	...................	.......................	...................	.............................................................	0	6606	0.738018
MK534637.1	...................	.......................	...................	.............................................................	0	6606	0.738018
MK534724.1	...................	.......................	...................	.............................................................	0	6606	0.738018
MK534702.1	...................	.......................	...................	.............................................................	0	6606	0.738018
MK534634.1	...................	.......................	...................	.............................................................	0	6606	0.738018
MK534709.1	...................	.......................	...................	.............................................................	0	6606	0.738018
JQ429081.1	...................	.......................	...................	.............................................................	0	6606	0.738018
GQ924617.1	...................	.......................	...................	.............................................................	0	6606	0.738018
KJ803784.1	...................	.......................	...................	.............................................................	0	6606	0.738018
JQ027328.1	...................	.......................	...................	.............................................................	0	6606	0.738018
HM011492.1	...................	.......................	...................	.............................................................	0	6606	0.738018
KX276814.1	...................	.......................	...................	.............................................................	0	6606	0.738018
JQ429079.1	...................	.......................	...................	.............................................................	0	6606	0.738018
KJ803758.1	...................	.......................	...................	.............................................................	0	6606	0.738018
KJ803755.1	...................	.......................	...................	.............................................................	0	6606	0.738018
GQ358136.1	...................	.......................	...................	.............................................................	0	6606	0.738018
GQ358144.1	...................	.......................	...................	.............................................................	0	6606	0.738018
GQ358145.1	...................	.......................	...................	.............................................................	0	6606	0.738018
GQ358147.1	...................	.......................	...................	.............................................................	0	6606	0.738018
AP011086.1	...................	.......................	...................	.............................................................	0	6606	0.738018
AP011087.1	...................	.......................	...................	.............................................................	0	6606	0.738018
AB540582.1	...................	.......................	...................	.............................................................	0	6606	0.738018
AP011095.1	...................	.......................	...................	.............................................................	0	6606	0.738018
GQ358149.1	...................	.......................	...................	.............................................................	0	6606	0.738018
GQ358152.1	...................	.......................	...................	.............................................................	0	6606	0.738018
GQ358151.1	...................	.......................	...................	.............................................................	0	6606	0.738018
GQ358150.1	...................	.......................	...................	.............................................................	0	6606	0.738018
KC774418.1	...................	.......................	...................	.............................................................	0	6606	0.738018
KY881953.1	...................	.......................	...................	.............................................................	0	6606	0.738018
KY881949.1	...................	.......................	...................	.............................................................	0	6606	0.738018
KY881951.1	...................	.......................	...................	.............................................................	0	6606	0.738018
KY881952.1	...................	.......................	...................	.............................................................	0	6606	0.738018
KY881958.1	...................	.......................	...................	.............................................................	0	6606	0.738018
KY881957.1	...................	.......................	...................	.............................................................	0	6606	0.738018
KY881944.1	...................	.......................	...................	.............................................................	0	6606	0.738018
KY881948.1	...................	.......................	...................	.............................................................	0	6606	0.738018
KY629635.1	...................	.......................	...................	.............................................................	0	6606	0.738018
KY629636.1	...................	.......................	...................	.............................................................	0	6606	0.738018
KJ173401.1	...................	.......................	...................	.............................................................	0	6606	0.738018
KJ173402.1	...................	.......................	...................	.............................................................	0	6606	0.738018
MZ675799.1	...................	.......................	...................	.............................................................	0	6606	0.738018
MZ675803.1	...................	.......................	...................	.............................................................	0	6606	0.738018
MZ675804.1	...................	.......................	...................	.............................................................	0	6606	0.738018
MZ675802.1	...................	.......................	...................	.............................................................	0	6606	0.738018
GQ924640.1	...................	.......................	...................	.............................................................	0	6606	0.738018
GQ924625.1	...................	.......................	...................	.............................................................	0	6606	0.738018
MZ934423.1	...................	.......................	...................	.............................................................	0	6606	0.738018
MZ934428.1	...................	.......................	...................	.............................................................	0	6606	0.738018
GQ924639.1	...................	.......................	...................	.............................................................	0	6606	0.738018
AB713531.1	...................	.......................	...................	.............................................................	0	6606	0.738018
GQ358140.1	...................	.......................	...................	.............................................................	0	6606	0.738018
GQ358142.1	...................	.......................	...................	.............................................................	0	6606	0.738018
LC036263.1	...................	.......................	...................	.............................................................	0	6606	0.738018
GQ358143.1	...................	.......................	...................	.............................................................	0	6606	0.738018
AP011088.1	...................	.......................	...................	.............................................................	0	6606	0.738018
AP011091.1	...................	.......................	...................	.............................................................	0	6606	0.738018
GQ358137.1	...................	.......................	...................	.............................................................	0	6606	0.738018
GQ358139.1	...................	.......................	...................	.............................................................	0	6606	0.738018
GQ358141.1	...................	.......................	...................	.............................................................	0	6606	0.738018
GQ358138.1	...................	.......................	...................	.............................................................	0	6606	0.738018
AP011090.1	...................	.......................	...................	.............................................................	0	6606	0.738018
KR013890.1	...................	.......................	...................	.............................................................	0	6606	0.738018
KJ598770.1	...................	.......................	...................	.............................................................	0	6606	0.738018
KJ598774.1	...................	.......................	...................	.............................................................	0	6606	0.738018
KJ598776.1	...................	.......................	...................	.............................................................	0	6606	0.738018
FJ562328.1	...................	.......................	...................	.............................................................	0	6606	0.738018
GQ475353.1	...................	.......................	...................	.............................................................	0	6606	0.738018
KY363265.1	...................	.......................	...................	.............................................................	0	6606	0.738018
MN689118.1	...................	.......................	...................	.............................................................	0	6606	0.738018
MK052976.1	...................	.......................	...................	.............................................................	0	6606	0.738018
LC500247.1	...................	.......................	...................	.............................................................	0	6606	0.738018
AB010292.1	...................	.......................	...................	.............................................................	0	6606	0.738018
AB010290.1	...................	.......................	...................	.............................................................	0	6606	0.738018
AB010291.1	...................	.......................	...................	.............................................................	0	6606	0.738018
LC603638.1	...................	.......................	...................	.............................................................	0	6606	0.738018
MH932712.1	...................	.......................	...................	.............................................................	0	6606	0.738018
AB010289.1	...................	.......................	...................	.............................................................	0	6606	0.738018
LC279272.1	...................	.......................	...................	.............................................................	0	6606	0.738018
LC279273.1	...................	.......................	...................	.............................................................	0	6606	0.738018
LC279269.1	...................	.......................	...................	.............................................................	0	6606	0.738018
LC279270.1	...................	.......................	...................	.............................................................	0	6606	0.738018
LC279271.1	...................	.......................	...................	.............................................................	0	6606	0.738018
KP659255.1	...................	.......................	...................	.............................................................	0	6606	0.738018
KP659224.1	...................	.......................	...................	.............................................................	0	6606	0.738018
KP659251.1	...................	.......................	...................	.............................................................	0	6606	0.738018
KP659248.1	...................	.......................	...................	.............................................................	0	6606	0.738018
JN792895.1	...................	.......................	...................	.............................................................	0	6606	0.738018
JN792896.1	...................	.......................	...................	.............................................................	0	6606	0.738018
KP659249.1	...................	.......................	...................	.............................................................	0	6606	0.738018
KP659252.1	...................	.......................	...................	.............................................................	0	6606	0.738018
KP659223.1	...................	.......................	...................	.............................................................	0	6606	0.738018
JN792901.1	...................	.......................	...................	.............................................................	0	6606	0.738018
JN792902.1	...................	.......................	...................	.............................................................	0	6606	0.738018
JN792899.1	...................	.......................	...................	.............................................................	0	6606	0.738018
JN792893.1	...................	.......................	...................	.............................................................	0	6606	0.738018
JN792900.1	...................	.......................	...................	.............................................................	0	6606	0.738018
JN792894.1	...................	.......................	...................	.............................................................	0	6606	0.738018
KP659254.1	...................	.......................	...................	.............................................................	0	6606	0.738018
JN792897.1	...................	.......................	...................	.............................................................	0	6606	0.738018
JN792898.1	...................	.......................	...................	.............................................................	0	6606	0.738018
KP659245.1	...................	.......................	...................	.............................................................	0	6606	0.738018
KP341011.1	...................	.......................	...................	.............................................................	0	6606	0.738018
KP659237.1	...................	.......................	...................	.............................................................	0	6606	0.738018
KP659246.1	...................	.......................	...................	.............................................................	0	6606	0.738018
KP659234.1	...................	.......................	...................	.............................................................	0	6606	0.738018
KP659235.1	...................	.......................	...................	.............................................................	0	6606	0.738018
KP659247.1	...................	.......................	...................	.............................................................	0	6606	0.738018
KR013928.1	...................	.......................	...................	.............................................................	0	6606	0.738018
KR013932.1	...................	.......................	...................	.............................................................	0	6606	0.738018
KR013936.1	...................	.......................	...................	.............................................................	0	6606	0.738018
KR013965.1	...................	.......................	...................	.............................................................	0	6606	0.738018
KR013963.1	...................	.......................	...................	.............................................................	0	6606	0.738018
KR013966.1	...................	.......................	...................	.............................................................	0	6606	0.738018
KR013964.1	...................	.......................	...................	.............................................................	0	6606	0.738018
FJ899780.1	...................	.......................	...................	.............................................................	0	6606	0.738018
FJ899781.1	...................	.......................	...................	.............................................................	0	6606	0.738018
FJ899782.1	...................	.......................	...................	.............................................................	0	6606	0.738018
JQ040174.1	...................	.......................	...................	.............................................................	0	6606	0.738018
KR014053.1	...................	.......................	...................	.............................................................	0	6606	0.738018
KR014042.1	...................	.......................	...................	.............................................................	0	6606	0.738018
KR014050.1	...................	.......................	...................	.............................................................	0	6606	0.738018
KR014054.1	...................	.......................	...................	.............................................................	0	6606	0.738018
KR013970.1	...................	.......................	...................	.............................................................	0	6606	0.738018
KJ598699.1	...................	.......................	...................	.............................................................	0	6606	0.738018
KJ598697.1	...................	.......................	...................	.............................................................	0	6606	0.738018
KJ598696.1	...................	.......................	...................	.............................................................	0	6606	0.738018
KJ598695.1	...................	.......................	...................	.............................................................	0	6606	0.738018
KJ598688.1	...................	.......................	...................	.............................................................	0	6606	0.738018
KJ598701.1	...................	.......................	...................	.............................................................	0	6606	0.738018
KJ598690.1	...................	.......................	...................	.............................................................	0	6606	0.738018
KR014093.1	...................	.......................	...................	.............................................................	0	6606	0.738018
MK052967.1	...................	.......................	...................	.............................................................	0	6606	0.738018
MK052970.1	...................	.......................	...................	.............................................................	0	6606	0.738018
MK534565.1	...................	.......................	...................	.............................................................	0	6606	0.738018
FJ562247.1	...................	.......................	...................	.............................................................	0	6606	0.738018
GQ377595.1	...................	.......................	...................	.............................................................	0	6606	0.738018
FJ787474.1	...................	.......................	...................	.............................................................	0	6606	0.738018
FJ562229.1	...................	.......................	...................	.............................................................	0	6606	0.738018
GQ377602.1	...................	.......................	...................	.............................................................	0	6606	0.738018
GQ377539.1	...................	.......................	...................	.............................................................	0	6606	0.738018
GQ377594.1	...................	.......................	...................	.............................................................	0	6606	0.738018
GQ377573.1	...................	.......................	...................	.............................................................	0	6606	0.738018
GQ377613.1	...................	.......................	...................	.............................................................	0	6606	0.738018
GQ377604.1	...................	.......................	...................	.............................................................	0	6606	0.738018
GQ377634.1	...................	.......................	...................	.............................................................	0	6606	0.738018
GQ377590.1	...................	.......................	...................	.............................................................	0	6606	0.738018
GQ377565.1	...................	.......................	...................	.............................................................	0	6606	0.738018
GQ377596.1	...................	.......................	...................	.............................................................	0	6606	0.738018
GQ377564.1	...................	.......................	...................	.............................................................	0	6606	0.738018
GQ377614.1	...................	.......................	...................	.............................................................	0	6606	0.738018
MN689119.1	...................	.......................	...................	.............................................................	0	6606	0.738018
KJ803796.1	...................	.......................	...................	.............................................................	0	6606	0.738018
JQ027311.1	...................	.......................	...................	.............................................................	0	6606	0.738018
HM011487.1	...................	.......................	...................	.............................................................	0	6606	0.738018
KJ803772.1	...................	.......................	...................	.............................................................	0	6606	0.738018
KX276827.1	...................	.......................	...................	.............................................................	0	6606	0.738018
HM011496.1	...................	.......................	...................	.............................................................	0	6606	0.738018
MG826152.1	...................	.......................	...................	.............................................................	0	6606	0.738018
GQ377592.1	...................	.......................	...................	.............................................................	0	6606	0.738018
MG826149.1	...................	.......................	...................	.............................................................	0	6606	0.738018
MK052968.1	...................	.......................	...................	.............................................................	0	6606	0.738018
MK534641.1	...................	.......................	...................	.............................................................	0	6606	0.738018
JQ801477.1	...................	.......................	...................	.............................................................	0	6606	0.738018
MK534616.1	...................	.......................	...................	.............................................................	0	6606	0.738018
MK534584.1	...................	.......................	...................	.............................................................	0	6606	0.738018
MK534611.1	...................	.......................	...................	.............................................................	0	6606	0.738018
MK534722.1	...................	.......................	...................	.............................................................	0	6606	0.738018
MK534662.1	...................	.......................	...................	.............................................................	0	6606	0.738018
MK534672.1	...................	.......................	...................	.............................................................	0	6606	0.738018
MK534723.1	...................	.......................	...................	.............................................................	0	6606	0.738018
MK534664.1	...................	.......................	...................	.............................................................	0	6606	0.738018
MK534688.1	...................	.......................	...................	.............................................................	0	6606	0.738018
MK534690.1	...................	.......................	...................	.............................................................	0	6606	0.738018
MK534623.1	...................	.......................	...................	.............................................................	0	6606	0.738018
MK534687.1	...................	.......................	...................	.............................................................	0	6606	0.738018
MK534686.1	...................	.......................	...................	.............................................................	0	6606	0.738018
MK534653.1	...................	.......................	...................	.............................................................	0	6606	0.738018
MK534606.1	...................	.......................	...................	.............................................................	0	6606	0.738018
MK534731.1	...................	.......................	...................	.............................................................	0	6606	0.738018
MK534721.1	...................	.......................	...................	.............................................................	0	6606	0.738018
MK534610.1	...................	.......................	...................	.............................................................	0	6606	0.738018
MK534681.1	...................	.......................	...................	.............................................................	0	6606	0.738018
MK534730.1	...................	.......................	...................	.............................................................	0	6606	0.738018
MK534620.1	...................	.......................	...................	.............................................................	0	6606	0.738018
MK534630.1	...................	.......................	...................	.............................................................	0	6606	0.738018
MK534635.1	...................	.......................	...................	.............................................................	0	6606	0.738018
KJ410497.1	...................	.......................	...................	.............................................................	0	6606	0.738018
MG826151.1	...................	.......................	...................	.............................................................	0	6606	0.738018
MK534566.1	...................	.......................	...................	.............................................................	0	6606	0.738018
MK534582.1	...................	.......................	...................	.............................................................	0	6606	0.738018
MK534589.1	...................	.......................	...................	.............................................................	0	6606	0.738018
MK534568.1	...................	.......................	...................	.............................................................	0	6606	0.738018
MK534561.1	...................	.......................	...................	.............................................................	0	6606	0.738018
MK534580.1	...................	.......................	...................	.............................................................	0	6606	0.738018
MK534646.1	...................	.......................	...................	.............................................................	0	6606	0.738018
MK534567.1	...................	.......................	...................	.............................................................	0	6606	0.738018
MK534625.1	...................	.......................	...................	.............................................................	0	6606	0.738018
MK534639.1	...................	.......................	...................	.............................................................	0	6606	0.738018
MK534564.1	...................	.......................	...................	.............................................................	0	6606	0.738018
MK534598.1	...................	.......................	...................	.............................................................	0	6606	0.738018
MK534648.1	...................	.......................	...................	.............................................................	0	6606	0.738018
MK534555.1	...................	.......................	...................	.............................................................	0	6606	0.738018
MK534559.1	...................	.......................	...................	.............................................................	0	6606	0.738018
MK534590.1	...................	.......................	...................	.............................................................	0	6606	0.738018
MK534713.1	...................	.......................	...................	.............................................................	0	6606	0.738018
MK534655.1	...................	.......................	...................	.............................................................	0	6606	0.738018
MK534617.1	...................	.......................	...................	.............................................................	0	6606	0.738018
MK534670.1	...................	.......................	...................	.............................................................	0	6606	0.738018
MK534695.1	...................	.......................	...................	.............................................................	0	6606	0.738018
MK534689.1	...................	.......................	...................	.............................................................	0	6606	0.738018
MK534609.1	...................	.......................	...................	.............................................................	0	6606	0.738018
MK534618.1	...................	.......................	...................	.............................................................	0	6606	0.738018
MK534654.1	...................	.......................	...................	.............................................................	0	6606	0.738018
MK534562.1	...................	.......................	...................	.............................................................	0	6606	0.738018
MK534569.1	...................	.......................	...................	.............................................................	0	6606	0.738018
MK534651.1	...................	.......................	...................	.............................................................	0	6606	0.738018
MK534583.1	...................	.......................	...................	.............................................................	0	6606	0.738018
MK534556.1	...................	.......................	...................	.............................................................	0	6606	0.738018
MK534633.1	...................	.......................	...................	.............................................................	0	6606	0.738018
MK534579.1	...................	.......................	...................	.............................................................	0	6606	0.738018
MK534607.1	...................	.......................	...................	.............................................................	0	6606	0.738018
MK534718.1	...................	.......................	...................	.............................................................	0	6606	0.738018
MK534563.1	...................	.......................	...................	.............................................................	0	6606	0.738018
KC315400.1	...................	.......................	...................	.............................................................	0	6606	0.738018
GQ377626.1	...................	.......................	...................	.............................................................	0	6606	0.738018
GQ377549.1	...................	.......................	...................	.............................................................	0	6606	0.738018
JF828909.1	...................	.......................	...................	.............................................................	0	6606	0.738018
KJ173334.1	...................	.......................	...................	.............................................................	0	6606	0.738018
KR014024.1	...................	.......................	...................	.............................................................	0	6606	0.738018
KR014022.1	...................	.......................	...................	.............................................................	0	6606	0.738018
KR014039.1	...................	.......................	...................	.............................................................	0	6606	0.738018
KR014036.1	...................	.......................	...................	.............................................................	0	6606	0.738018
KR014038.1	...................	.......................	...................	.............................................................	0	6606	0.738018
KM875406.1	...................	.......................	...................	.............................................................	0	6606	0.738018
KR013902.1	...................	.......................	...................	.............................................................	0	6606	0.738018
KR013905.1	...................	.......................	...................	.............................................................	0	6606	0.738018
KR013997.1	...................	.......................	...................	.............................................................	0	6606	0.738018
KR013995.1	...................	.......................	...................	.............................................................	0	6606	0.738018
JQ801498.1	...................	.......................	...................	.............................................................	0	6606	0.738018
KJ173323.1	...................	.......................	...................	.............................................................	0	6606	0.738018
KR013899.1	...................	.......................	...................	.............................................................	0	6606	0.738018
KC875266.1	...................	.......................	...................	.............................................................	0	6606	0.738018
MF925378.1	...................	.......................	...................	.............................................................	0	6606	0.738018
MF925398.1	...................	.......................	...................	.............................................................	0	6606	0.738018
LC535935.1	...................	.......................	...................	.............................................................	0	6606	0.738018
KT364719.1	...................	.......................	...................	.............................................................	0	6606	0.738018
KT364720.1	...................	.......................	...................	.............................................................	0	6606	0.738018
FJ787450.1	...................	.......................	...................	.............................................................	0	6606	0.738018
FJ899772.1	...................	.......................	...................	.............................................................	0	6606	0.738018
FJ899773.1	...................	.......................	...................	.............................................................	0	6606	0.738018
KJ173338.1	...................	.......................	...................	.............................................................	0	6606	0.738018
FJ899796.1	...................	.......................	...................	.............................................................	0	6606	0.738018
KJ598745.1	...................	.......................	...................	.............................................................	0	6606	0.738018
FJ787448.1	...................	.......................	...................	.............................................................	0	6606	0.738018
EU916208.1	...................	.......................	...................	.............................................................	0	6606	0.738018
KR013986.1	...................	.......................	...................	.............................................................	0	6606	0.738018
KR014003.1	...................	.......................	...................	.............................................................	0	6606	0.738018
KR014080.1	...................	.......................	...................	.............................................................	0	6606	0.738018
KY363261.1	...................	.......................	...................	.............................................................	0	6606	0.738018
JF828914.1	...................	.......................	...................	.............................................................	0	6606	0.738018
KJ598766.1	...................	.......................	...................	.............................................................	0	6606	0.738018
KR013955.1	...................	.......................	...................	.............................................................	0	6606	0.738018
KR013956.1	...................	.......................	...................	.............................................................	0	6606	0.738018
KR013957.1	...................	.......................	...................	.............................................................	0	6606	0.738018
KR013954.1	...................	.......................	...................	.............................................................	0	6606	0.738018
KR013958.1	...................	.......................	...................	.............................................................	0	6606	0.738018
KR013941.1	...................	.......................	...................	.............................................................	0	6606	0.738018
KR013938.1	...................	.......................	...................	.............................................................	0	6606	0.738018
KR013940.1	...................	.......................	...................	.............................................................	0	6606	0.738018
KR014008.1	...................	.......................	...................	.............................................................	0	6606	0.738018
KJ598775.1	...................	.......................	...................	.............................................................	0	6606	0.738018
KJ598771.1	...................	.......................	...................	.............................................................	0	6606	0.738018
KJ598773.1	...................	.......................	...................	.............................................................	0	6606	0.738018
KJ598768.1	...................	.......................	...................	.............................................................	0	6606	0.738018
KJ598777.1	...................	.......................	...................	.............................................................	0	6606	0.738018
MN683716.1	...................	.......................	...................	.............................................................	0	6606	0.738018
KP276253.1	...................	.......................	...................	.............................................................	0	6606	0.738018
MN683708.1	...................	.......................	...................	.............................................................	0	6606	0.738018
MN683709.1	...................	.......................	...................	.............................................................	0	6606	0.738018
KX660688.1	...................	.......................	...................	.............................................................	0	6606	0.738018
MN683705.1	...................	.......................	...................	.............................................................	0	6606	0.738018
KX660681.1	...................	.......................	...................	.............................................................	0	6606	0.738018
KX660679.1	...................	.......................	...................	.............................................................	0	6606	0.738018
MN683718.1	...................	.......................	...................	.............................................................	0	6606	0.738018
MN650076.1	...................	.......................	...................	.............................................................	0	6606	0.738018
MN683706.1	...................	.......................	...................	.............................................................	0	6606	0.738018
KX660684.1	...................	.......................	...................	.............................................................	0	6606	0.738018
MN683703.1	...................	.......................	...................	.............................................................	0	6606	0.738018
MN683696.1	...................	.......................	...................	.............................................................	0	6606	0.738018
KT991425.1	...................	.......................	...................	.............................................................	0	6606	0.738018
KT991427.1	...................	.......................	...................	.............................................................	0	6606	0.738018
MN683702.1	...................	.......................	...................	.............................................................	0	6606	0.738018
MN683713.1	...................	.......................	...................	.............................................................	0	6606	0.738018
MN683721.1	...................	.......................	...................	.............................................................	0	6606	0.738018
MN683701.1	...................	.......................	...................	.............................................................	0	6606	0.738018
MN650080.1	...................	.......................	...................	.............................................................	0	6606	0.738018
MN650082.1	...................	.......................	...................	.............................................................	0	6606	0.738018
MN650083.1	...................	.......................	...................	.............................................................	0	6606	0.738018
MN650081.1	...................	.......................	...................	.............................................................	0	6606	0.738018
MN650084.1	...................	.......................	...................	.............................................................	0	6606	0.738018
MN650070.1	...................	.......................	...................	.............................................................	0	6606	0.738018
MN650079.1	...................	.......................	...................	.............................................................	0	6606	0.738018
MN683712.1	...................	.......................	...................	.............................................................	0	6606	0.738018
MN683715.1	...................	.......................	...................	.............................................................	0	6606	0.738018
MN650069.1	...................	.......................	...................	.............................................................	0	6606	0.738018
MN683725.1	...................	.......................	...................	.............................................................	0	6606	0.738018
KP276256.1	...................	.......................	...................	.............................................................	0	6606	0.738018
MN683717.1	...................	.......................	...................	.............................................................	0	6606	0.738018
MN683700.1	...................	.......................	...................	.............................................................	0	6606	0.738018
HM750150.1	...................	.......................	...................	.............................................................	0	6606	0.738018
MN650085.1	...................	.......................	...................	.............................................................	0	6606	0.738018
MN650074.1	...................	.......................	...................	.............................................................	0	6606	0.738018
MN650075.1	...................	.......................	...................	.............................................................	0	6606	0.738018
MN650077.1	...................	.......................	...................	.............................................................	0	6606	0.738018
MN650078.1	...................	.......................	...................	.............................................................	0	6606	0.738018
MN650073.1	...................	.......................	...................	.............................................................	0	6606	0.738018
MN650072.1	...................	.......................	...................	.............................................................	0	6606	0.738018
MN650086.1	...................	.......................	...................	.............................................................	0	6606	0.738018
MT645061.1	...................	.......................	...................	.............................................................	0	6606	0.738018
MN650071.1	...................	.......................	...................	.............................................................	0	6606	0.738018
MN650087.1	...................	.......................	...................	.............................................................	0	6606	0.738018
MN683722.1	...................	.......................	...................	.............................................................	0	6606	0.738018
HM750146.1	...................	.......................	...................	.............................................................	0	6606	0.738018
MN683687.1	...................	.......................	...................	.............................................................	0	6606	0.738018
MN683688.1	...................	.......................	...................	.............................................................	0	6606	0.738018
MN683710.1	...................	.......................	...................	.............................................................	0	6606	0.738018
KX660690.1	...................	.......................	...................	.............................................................	0	6606	0.738018
MN683699.1	...................	.......................	...................	.............................................................	0	6606	0.738018
MN683723.1	...................	.......................	...................	.............................................................	0	6606	0.738018
HM750145.1	...................	.......................	...................	.............................................................	0	6606	0.738018
MN683691.1	...................	.......................	...................	.............................................................	0	6606	0.738018
MN683693.1	...................	.......................	...................	.............................................................	0	6606	0.738018
HM750148.1	...................	.......................	...................	.............................................................	0	6606	0.738018
KC774482.1	...................	.......................	...................	.............................................................	0	6606	0.738018
MN683692.1	...................	.......................	...................	.............................................................	0	6606	0.738018
MN683694.1	...................	.......................	...................	.............................................................	0	6606	0.738018
MN683704.1	...................	.......................	...................	.............................................................	0	6606	0.738018
KX660678.1	...................	.......................	...................	.............................................................	0	6606	0.738018
HM750143.1	...................	.......................	...................	.............................................................	0	6606	0.738018
FJ349241.1	...................	.......................	...................	.............................................................	0	6606	0.738018
MN683686.1	...................	.......................	...................	.............................................................	0	6606	0.738018
MN683724.1	...................	.......................	...................	.............................................................	0	6606	0.738018
MN683690.1	...................	.......................	...................	.............................................................	0	6606	0.738018
MN683689.1	...................	.......................	...................	.............................................................	0	6606	0.738018
HM750147.1	...................	.......................	...................	.............................................................	0	6606	0.738018
KC774456.1	...................	.......................	...................	.............................................................	0	6606	0.738018
HM750142.1	...................	.......................	...................	.............................................................	0	6606	0.738018
HM750149.1	...................	.......................	...................	.............................................................	0	6606	0.738018
MN683697.1	...................	.......................	...................	.............................................................	0	6606	0.738018
MN683695.1	...................	.......................	...................	.............................................................	0	6606	0.738018
MN683698.1	...................	.......................	...................	.............................................................	0	6606	0.738018
KR013904.1	...................	.......................	...................	.............................................................	0	6606	0.738018
KR013996.1	...................	.......................	...................	.............................................................	0	6606	0.738018
KR013895.1	...................	.......................	...................	.............................................................	0	6606	0.738018
KJ598763.1	...................	.......................	...................	.............................................................	0	6606	0.738018
FJ386580.1	...................	.......................	...................	.............................................................	0	6606	0.738018
EU916207.1	...................	.......................	...................	.............................................................	0	6606	0.738018
EU916209.1	...................	.......................	...................	.............................................................	0	6606	0.738018
KJ173318.1	...................	.......................	...................	.............................................................	0	6606	0.738018
KR014084.1	...................	.......................	...................	.............................................................	0	6606	0.738018
EU916205.1	...................	.......................	...................	.............................................................	0	6606	0.738018
EU916235.1	...................	.......................	...................	.............................................................	0	6606	0.738018
KR013982.1	...................	.......................	...................	.............................................................	0	6606	0.738018
KR013983.1	...................	.......................	...................	.............................................................	0	6606	0.738018
KJ598700.1	...................	.......................	...................	.............................................................	0	6606	0.738018
KJ598692.1	...................	.......................	...................	.............................................................	0	6606	0.738018
KJ598704.1	...................	.......................	...................	.............................................................	0	6606	0.738018
KJ598758.1	...................	.......................	...................	.............................................................	0	6606	0.738018
GQ184325.1	...................	.......................	...................	.............................................................	0	6606	0.738018
KR013898.1	...................	.......................	...................	.............................................................	0	6606	0.738018
KM875407.1	...................	.......................	...................	.............................................................	0	6606	0.738018
KR014035.1	...................	.......................	...................	.............................................................	0	6606	0.738018
KR013933.1	...................	.......................	...................	.............................................................	0	6606	0.738018
EU678473.1	...................	.......................	...................	.............................................................	0	6606	0.738018
EU678470.1	...................	.......................	...................	.............................................................	0	6606	0.738018
EU678475.1	...................	.......................	...................	.............................................................	0	6606	0.738018
KR013887.1	...................	.......................	...................	.............................................................	0	6606	0.738018
EU916220.1	...................	.......................	...................	.............................................................	0	6606	0.738018
KR014034.1	...................	.......................	...................	.............................................................	0	6606	0.738018
KY470928.1	...................	.......................	...................	.............................................................	0	6606	0.738018
KR014009.1	...................	.......................	...................	.............................................................	0	6606	0.738018
KR014010.1	...................	.......................	...................	.............................................................	0	6606	0.738018
KR014011.1	...................	.......................	...................	.............................................................	0	6606	0.738018
KR014016.1	...................	.......................	...................	.............................................................	0	6606	0.738018
KR014012.1	...................	.......................	...................	.............................................................	0	6606	0.738018
KR014017.1	...................	.......................	...................	.............................................................	0	6606	0.738018
KR014015.1	...................	.......................	...................	.............................................................	0	6606	0.738018
KJ598764.1	...................	.......................	...................	.............................................................	0	6606	0.738018
KJ598755.1	...................	.......................	...................	.............................................................	0	6606	0.738018
KJ598761.1	...................	.......................	...................	.............................................................	0	6606	0.738018
KJ598756.1	...................	.......................	...................	.............................................................	0	6606	0.738018
KJ598757.1	...................	.......................	...................	.............................................................	0	6606	0.738018
KJ598765.1	...................	.......................	...................	.............................................................	0	6606	0.738018
KJ598779.1	...................	.......................	...................	.............................................................	0	6606	0.738018
JQ040153.1	...................	.......................	...................	.............................................................	0	6606	0.738018
JQ040161.1	...................	.......................	...................	.............................................................	0	6606	0.738018
KJ598767.1	...................	.......................	...................	.............................................................	0	6606	0.738018
KJ598778.1	...................	.......................	...................	.............................................................	0	6606	0.738018
MZ439569.1	...................	.......................	...................	.............................................................	0	6606	0.738018
MZ439691.1	...................	.......................	...................	.............................................................	0	6606	0.738018
MZ439658.1	...................	.......................	...................	.............................................................	0	6606	0.738018
MZ439646.1	...................	.......................	...................	.............................................................	0	6606	0.738018
MZ439654.1	...................	.......................	...................	.............................................................	0	6606	0.738018
MZ439653.1	...................	.......................	...................	.............................................................	0	6606	0.738018
MZ439655.1	...................	.......................	...................	.............................................................	0	6606	0.738018
MZ439662.1	...................	.......................	...................	.............................................................	0	6606	0.738018
MZ439684.1	...................	.......................	...................	.............................................................	0	6606	0.738018
MZ439692.1	...................	.......................	...................	.............................................................	0	6606	0.738018
MZ439675.1	...................	.......................	...................	.............................................................	0	6606	0.738018
MZ439686.1	...................	.......................	...................	.............................................................	0	6606	0.738018
MZ439693.1	...................	.......................	...................	.............................................................	0	6606	0.738018
MZ439671.1	...................	.......................	...................	.............................................................	0	6606	0.738018
MZ439682.1	...................	.......................	...................	.............................................................	0	6606	0.738018
MZ439674.1	...................	.......................	...................	.............................................................	0	6606	0.738018
MZ439687.1	...................	.......................	...................	.............................................................	0	6606	0.738018
MZ439677.1	...................	.......................	...................	.............................................................	0	6606	0.738018
MZ439679.1	...................	.......................	...................	.............................................................	0	6606	0.738018
MZ439690.1	...................	.......................	...................	.............................................................	0	6606	0.738018
MZ439667.1	...................	.......................	...................	.............................................................	0	6606	0.738018
MZ439680.1	...................	.......................	...................	.............................................................	0	6606	0.738018
MZ439683.1	...................	.......................	...................	.............................................................	0	6606	0.738018
MZ439663.1	...................	.......................	...................	.............................................................	0	6606	0.738018
MZ439669.1	...................	.......................	...................	.............................................................	0	6606	0.738018
MZ439676.1	...................	.......................	...................	.............................................................	0	6606	0.738018
MZ439649.1	...................	.......................	...................	.............................................................	0	6606	0.738018
MZ439665.1	...................	.......................	...................	.............................................................	0	6606	0.738018
MZ439643.1	...................	.......................	...................	.............................................................	0	6606	0.738018
MZ439661.1	...................	.......................	...................	.............................................................	0	6606	0.738018
MZ439735.1	...................	.......................	...................	.............................................................	0	6606	0.738018
MZ439726.1	...................	.......................	...................	.............................................................	0	6606	0.738018
MZ439723.1	...................	.......................	...................	.............................................................	0	6606	0.738018
MZ439730.1	...................	.......................	...................	.............................................................	0	6606	0.738018
MZ439733.1	...................	.......................	...................	.............................................................	0	6606	0.738018
MZ439734.1	...................	.......................	...................	.............................................................	0	6606	0.738018
MZ439732.1	...................	.......................	...................	.............................................................	0	6606	0.738018
MZ439729.1	...................	.......................	...................	.............................................................	0	6606	0.738018
MZ439727.1	...................	.......................	...................	.............................................................	0	6606	0.738018
MZ439736.1	...................	.......................	...................	.............................................................	0	6606	0.738018
MZ439737.1	...................	.......................	...................	.............................................................	0	6606	0.738018
MZ439731.1	...................	.......................	...................	.............................................................	0	6606	0.738018
MZ439728.1	...................	.......................	...................	.............................................................	0	6606	0.738018
MZ439724.1	...................	.......................	...................	.............................................................	0	6606	0.738018
MZ439722.1	...................	.......................	...................	.............................................................	0	6606	0.738018
MZ439721.1	...................	.......................	...................	.............................................................	0	6606	0.738018
MZ439725.1	...................	.......................	...................	.............................................................	0	6606	0.738018
MZ439694.1	...................	.......................	...................	.............................................................	0	6606	0.738018
MZ439702.1	...................	.......................	...................	.............................................................	0	6606	0.738018
MZ439703.1	...................	.......................	...................	.............................................................	0	6606	0.738018
MZ439711.1	...................	.......................	...................	.............................................................	0	6606	0.738018
MZ439715.1	...................	.......................	...................	.............................................................	0	6606	0.738018
MZ439705.1	...................	.......................	...................	.............................................................	0	6606	0.738018
MZ439700.1	...................	.......................	...................	.............................................................	0	6606	0.738018
MZ439706.1	...................	.......................	...................	.............................................................	0	6606	0.738018
MZ439699.1	...................	.......................	...................	.............................................................	0	6606	0.738018
MZ439720.1	...................	.......................	...................	.............................................................	0	6606	0.738018
MZ439710.1	...................	.......................	...................	.............................................................	0	6606	0.738018
MZ439714.1	...................	.......................	...................	.............................................................	0	6606	0.738018
MZ439707.1	...................	.......................	...................	.............................................................	0	6606	0.738018
MZ439704.1	...................	.......................	...................	.............................................................	0	6606	0.738018
MZ439709.1	...................	.......................	...................	.............................................................	0	6606	0.738018
MZ439697.1	...................	.......................	...................	.............................................................	0	6606	0.738018
MZ439719.1	...................	.......................	...................	.............................................................	0	6606	0.738018
MZ439716.1	...................	.......................	...................	.............................................................	0	6606	0.738018
MZ439708.1	...................	.......................	...................	.............................................................	0	6606	0.738018
MZ439698.1	...................	.......................	...................	.............................................................	0	6606	0.738018
MZ439701.1	...................	.......................	...................	.............................................................	0	6606	0.738018
MZ439713.1	...................	.......................	...................	.............................................................	0	6606	0.738018
MZ439712.1	...................	.......................	...................	.............................................................	0	6606	0.738018
MZ439695.1	...................	.......................	...................	.............................................................	0	6606	0.738018
MZ439696.1	...................	.......................	...................	.............................................................	0	6606	0.738018
MZ439650.1	...................	.......................	...................	.............................................................	0	6606	0.738018
MZ439656.1	...................	.......................	...................	.............................................................	0	6606	0.738018
MZ439659.1	...................	.......................	...................	.............................................................	0	6606	0.738018
MZ439652.1	...................	.......................	...................	.............................................................	0	6606	0.738018
MZ439672.1	...................	.......................	...................	.............................................................	0	6606	0.738018
MZ439648.1	...................	.......................	...................	.............................................................	0	6606	0.738018
MZ439651.1	...................	.......................	...................	.............................................................	0	6606	0.738018
MZ439678.1	...................	.......................	...................	.............................................................	0	6606	0.738018
MZ439670.1	...................	.......................	...................	.............................................................	0	6606	0.738018
MZ439668.1	...................	.......................	...................	.............................................................	0	6606	0.738018
MZ439644.1	...................	.......................	...................	.............................................................	0	6606	0.738018
MZ439640.1	...................	.......................	...................	.............................................................	0	6606	0.738018
MZ439645.1	...................	.......................	...................	.............................................................	0	6606	0.738018
MZ439641.1	...................	.......................	...................	.............................................................	0	6606	0.738018
MZ439642.1	...................	.......................	...................	.............................................................	0	6606	0.738018
MK534613.1	...................	.......................	...................	.............................................................	0	6606	0.738018
MF925403.1	...................	.......................	...................	.............................................................	0	6606	0.738018
KX276849.1	...................	.......................	...................	.............................................................	0	6606	0.738018
LC456133.1	...................	.......................	...................	.............................................................	0	6606	0.738018
MF488703.1	...................	.......................	...................	.............................................................	0	6606	0.738018
MF925382.1	...................	.......................	...................	.............................................................	0	6606	0.738018
MT114171.1	...................	.......................	...................	.............................................................	0	6606	0.738018
JQ027326.1	...................	.......................	...................	.............................................................	0	6606	0.738018
MF925399.1	...................	.......................	...................	.............................................................	0	6606	0.738018
KJ803785.1	...................	.......................	...................	.............................................................	0	6606	0.738018
LC519821.1	...................	.......................	...................	.............................................................	0	6606	0.738018
JQ801499.1	...................	.......................	...................	.............................................................	0	6606	0.738018
JQ801517.1	...................	.......................	...................	.............................................................	0	6606	0.738018
MK534679.1	...................	.......................	...................	.............................................................	0	6606	0.738018
MG826147.1	...................	.......................	...................	.............................................................	0	6606	0.738018
MG826140.1	...................	.......................	...................	.............................................................	0	6606	0.738018
MG826141.1	...................	.......................	...................	.............................................................	0	6606	0.738018
MG826138.1	...................	.......................	...................	.............................................................	0	6606	0.738018
MG826139.1	...................	.......................	...................	.............................................................	0	6606	0.738018
KX276843.1	...................	.......................	...................	.............................................................	0	6606	0.738018
KX276845.1	...................	.......................	...................	.............................................................	0	6606	0.738018
OM669689.1	...................	.......................	...................	.............................................................	0	6606	0.738018
KX276842.1	...................	.......................	...................	.............................................................	0	6606	0.738018
KJ410515.1	...................	.......................	...................	.............................................................	0	6606	0.738018
JF436923.1	...................	.......................	...................	.............................................................	0	6606	0.738018
JQ027324.1	...................	.......................	...................	.............................................................	0	6606	0.738018
JQ027314.1	...................	.......................	...................	.............................................................	0	6606	0.738018
OM669695.1	...................	.......................	...................	.............................................................	0	6606	0.738018
LC456110.1	...................	.......................	...................	.............................................................	0	6606	0.738018
LC456116.1	...................	.......................	...................	.............................................................	0	6606	0.738018
GQ924643.1	...................	.......................	...................	.............................................................	0	6606	0.738018
MZ439304.1	...................	.......................	...................	.............................................................	0	6606	0.738018
MZ439294.1	...................	.......................	...................	.............................................................	0	6606	0.738018
MZ439305.1	...................	.......................	...................	.............................................................	0	6606	0.738018
MZ439302.1	...................	.......................	...................	.............................................................	0	6606	0.738018
MZ439300.1	...................	.......................	...................	.............................................................	0	6606	0.738018
MZ439301.1	...................	.......................	...................	.............................................................	0	6606	0.738018
MZ439290.1	...................	.......................	...................	.............................................................	0	6606	0.738018
MZ439291.1	...................	.......................	...................	.............................................................	0	6606	0.738018
MZ439306.1	...................	.......................	...................	.............................................................	0	6606	0.738018
MZ439303.1	...................	.......................	...................	.............................................................	0	6606	0.738018
MZ439297.1	...................	.......................	...................	.............................................................	0	6606	0.738018
MZ439295.1	...................	.......................	...................	.............................................................	0	6606	0.738018
MZ439292.1	...................	.......................	...................	.............................................................	0	6606	0.738018
MZ439293.1	...................	.......................	...................	.............................................................	0	6606	0.738018
MZ439296.1	...................	.......................	...................	.............................................................	0	6606	0.738018
MZ439298.1	...................	.......................	...................	.............................................................	0	6606	0.738018
MZ439299.1	...................	.......................	...................	.............................................................	0	6606	0.738018
KM875424.1	...................	.......................	...................	.............................................................	0	6606	0.738018
MZ439348.1	...................	.......................	...................	.............................................................	0	6606	0.738018
KR014040.1	...................	.......................	...................	.............................................................	0	6606	0.738018
KR013906.1	...................	.......................	...................	.............................................................	0	6606	0.738018
KR013935.1	...................	.......................	...................	.............................................................	0	6606	0.738018
MZ439590.1	...................	.......................	...................	.............................................................	0	6606	0.738018
MZ439598.1	...................	.......................	...................	.............................................................	0	6606	0.738018
MZ439579.1	...................	.......................	...................	.............................................................	0	6606	0.738018
MZ439562.1	...................	.......................	...................	.............................................................	0	6606	0.738018
MZ439571.1	...................	.......................	...................	.............................................................	0	6606	0.738018
MZ439575.1	...................	.......................	...................	.............................................................	0	6606	0.738018
MZ439572.1	...................	.......................	...................	.............................................................	0	6606	0.738018
MZ439576.1	...................	.......................	...................	.............................................................	0	6606	0.738018
MZ439574.1	...................	.......................	...................	.............................................................	0	6606	0.738018
MZ439573.1	...................	.......................	...................	.............................................................	0	6606	0.738018
MK818227.1	...................	.......................	...................	.............................................................	0	6606	0.738018
HM011472.1	...................	.......................	...................	.............................................................	0	6606	0.738018
OM669639.1	...................	.......................	...................	.............................................................	0	6606	0.738018
MG571345.1	...................	.......................	...................	.............................................................	0	6606	0.738018
KX276852.1	...................	.......................	...................	.............................................................	0	6606	0.738018
HM011501.1	...................	.......................	...................	.............................................................	0	6606	0.738018
OM669650.1	...................	.......................	...................	.............................................................	0	6606	0.738018
OM669640.1	...................	.......................	...................	.............................................................	0	6606	0.738018
OM669696.1	...................	.......................	...................	.............................................................	0	6606	0.738018
LC535928.1	...................	.......................	...................	.............................................................	0	6606	0.738018
MF674390.1	...................	.......................	...................	.............................................................	0	6606	0.738018
JQ801491.1	...................	.......................	...................	.............................................................	0	6606	0.738018
JQ801523.1	...................	.......................	...................	.............................................................	0	6606	0.738018
KF214675.1	...................	.......................	...................	.............................................................	0	6606	0.738018
JQ801509.1	...................	.......................	...................	.............................................................	0	6606	0.738018
LC535921.1	...................	.......................	...................	.............................................................	0	6606	0.738018
KR014023.1	...................	.......................	...................	.............................................................	0	6606	0.738018
KR013836.1	...................	.......................	...................	.............................................................	0	6606	0.738018
KR013839.1	...................	.......................	...................	.............................................................	0	6606	0.738018
LC535932.1	...................	.......................	...................	.............................................................	0	6606	0.738018
JQ801483.1	...................	.......................	...................	.............................................................	0	6606	0.738018
KJ803823.1	...................	.......................	...................	.............................................................	0	6606	0.738018
JQ801508.1	...................	.......................	...................	.............................................................	0	6606	0.738018
GQ184326.1	...................	.......................	...................	.............................................................	0	6606	0.738018
JQ429078.1	...................	.......................	...................	.............................................................	0	6606	0.738018
KJ803776.1	...................	.......................	...................	.............................................................	0	6606	0.738018
KJ803812.1	...................	.......................	...................	.............................................................	0	6606	0.738018
KT366464.1	...................	.......................	...................	.............................................................	0	6606	0.738018
KY470937.1	...................	.......................	...................	.............................................................	0	6606	0.738018
KY470945.1	...................	.......................	...................	.............................................................	0	6606	0.738018
KY470947.1	...................	.......................	...................	.............................................................	0	6606	0.738018
KY470952.1	...................	.......................	...................	.............................................................	0	6606	0.738018
JQ801487.1	...................	.......................	...................	.............................................................	0	6606	0.738018
LC519803.1	...................	.......................	...................	.............................................................	0	6606	0.738018
MF925369.1	...................	.......................	...................	.............................................................	0	6606	0.738018
LC535925.1	...................	.......................	...................	.............................................................	0	6606	0.738018
GQ924614.1	...................	.......................	...................	.............................................................	0	6606	0.738018
KX276853.1	...................	.......................	...................	.............................................................	0	6606	0.738018
KY881976.1	...................	.......................	...................	.............................................................	0	6606	0.738018
KY881998.1	...................	.......................	...................	.............................................................	0	6606	0.738018
KY881983.1	...................	.......................	...................	.............................................................	0	6606	0.738018
KY881965.1	...................	.......................	...................	.............................................................	0	6606	0.738018
KY881999.1	...................	.......................	...................	.............................................................	0	6606	0.738018
KY881995.1	...................	.......................	...................	.............................................................	0	6606	0.738018
KY881969.1	...................	.......................	...................	.............................................................	0	6606	0.738018
KY881928.1	...................	.......................	...................	.............................................................	0	6606	0.738018
KY881985.1	...................	.......................	...................	.............................................................	0	6606	0.738018
KY881975.1	...................	.......................	...................	.............................................................	0	6606	0.738018
KY881916.1	...................	.......................	...................	.............................................................	0	6606	0.738018
KY881982.1	...................	.......................	...................	.............................................................	0	6606	0.738018
KY881963.1	...................	.......................	...................	.............................................................	0	6606	0.738018
KY881923.1	...................	.......................	...................	.............................................................	0	6606	0.738018
KY881977.1	...................	.......................	...................	.............................................................	0	6606	0.738018
KY881926.1	...................	.......................	...................	.............................................................	0	6606	0.738018
KY881935.1	...................	.......................	...................	.............................................................	0	6606	0.738018
KY881936.1	...................	.......................	...................	.............................................................	0	6606	0.738018
KY881986.1	...................	.......................	...................	.............................................................	0	6606	0.738018
KY881932.1	...................	.......................	...................	.............................................................	0	6606	0.738018
KY881931.1	...................	.......................	...................	.............................................................	0	6606	0.738018
KY881930.1	...................	.......................	...................	.............................................................	0	6606	0.738018
KY881929.1	...................	.......................	...................	.............................................................	0	6606	0.738018
KY881925.1	...................	.......................	...................	.............................................................	0	6606	0.738018
KY881924.1	...................	.......................	...................	.............................................................	0	6606	0.738018
KY881927.1	...................	.......................	...................	.............................................................	0	6606	0.738018
KY881933.1	...................	.......................	...................	.............................................................	0	6606	0.738018
KY881934.1	...................	.......................	...................	.............................................................	0	6606	0.738018
KY881996.1	...................	.......................	...................	.............................................................	0	6606	0.738018
KY881938.1	...................	.......................	...................	.............................................................	0	6606	0.738018
KY881939.1	...................	.......................	...................	.............................................................	0	6606	0.738018
KY882000.1	...................	.......................	...................	.............................................................	0	6606	0.738018
KY881876.1	...................	.......................	...................	.............................................................	0	6606	0.738018
KY881873.1	...................	.......................	...................	.............................................................	0	6606	0.738018
KY881882.1	...................	.......................	...................	.............................................................	0	6606	0.738018
KY881840.1	...................	.......................	...................	.............................................................	0	6606	0.738018
OM669691.1	...................	.......................	...................	.............................................................	0	6606	0.738018
EU570074.1	...................	.......................	...................	.............................................................	0	6606	0.738018
KY881959.1	...................	.......................	...................	.............................................................	0	6606	0.738018
FJ562337.1	...................	.......................	...................	.............................................................	0	6606	0.738018
GQ377621.1	...................	.......................	...................	.............................................................	0	6606	0.738018
JQ040168.1	...................	.......................	...................	.............................................................	0	6606	0.738018
FJ787437.1	...................	.......................	...................	.............................................................	0	6606	0.738018
KR014006.1	...................	.......................	...................	.............................................................	0	6606	0.738018
GU385774.1	...................	.......................	...................	.............................................................	0	6606	0.738018
FJ899771.1	...................	.......................	...................	.............................................................	0	6606	0.738018
GQ377552.1	...................	.......................	...................	.............................................................	0	6606	0.738018
KY881803.1	...................	.......................	...................	.............................................................	0	6606	0.738018
KY881807.1	...................	.......................	...................	.............................................................	0	6606	0.738018
KY881810.1	...................	.......................	...................	.............................................................	0	6606	0.738018
LC516606.1	...................	.......................	...................	.............................................................	0	6606	0.738018
FJ032339.1	...................	.......................	...................	.............................................................	0	6606	0.738018
FJ032336.1	...................	.......................	...................	.............................................................	0	6606	0.738018
GQ377526.1	...................	.......................	...................	.............................................................	0	6606	0.738018
FJ562331.1	...................	.......................	...................	.............................................................	0	6606	0.738018
FJ787484.1	...................	.......................	...................	.............................................................	0	6606	0.738018
EU916217.1	...................	.......................	...................	.............................................................	0	6606	0.738018
KR014041.1	...................	.......................	...................	.............................................................	0	6606	0.738018
KJ173330.1	...................	.......................	...................	.............................................................	0	6606	0.738018
FJ562335.1	...................	.......................	...................	.............................................................	0	6606	0.738018
KR013805.1	...................	.......................	...................	.............................................................	0	6606	0.738018
GQ377599.1	...................	.......................	...................	.............................................................	0	6606	0.738018
KR013869.1	...................	.......................	...................	.............................................................	0	6606	0.738018
KR013865.1	...................	.......................	...................	.............................................................	0	6606	0.738018
KR013867.1	...................	.......................	...................	.............................................................	0	6606	0.738018
KR013863.1	...................	.......................	...................	.............................................................	0	6606	0.738018
JQ040146.1	...................	.......................	...................	.............................................................	0	6606	0.738018
FJ386673.1	...................	.......................	...................	.............................................................	0	6606	0.738018
KC774344.1	...................	.......................	...................	.............................................................	0	6606	0.738018
FJ032355.1	...................	.......................	...................	.............................................................	0	6606	0.738018
KY881818.1	...................	.......................	...................	.............................................................	0	6606	0.738018
KY881815.1	...................	.......................	...................	.............................................................	0	6606	0.738018
KY881806.1	...................	.......................	...................	.............................................................	0	6606	0.738018
KY881804.1	...................	.......................	...................	.............................................................	0	6606	0.738018
KY881819.1	...................	.......................	...................	.............................................................	0	6606	0.738018
FJ562279.1	...................	.......................	...................	.............................................................	0	6606	0.738018
LC064754.1	...................	.......................	...................	.............................................................	0	6606	0.738018
FJ032334.1	...................	.......................	...................	.............................................................	0	6606	0.738018
GQ377520.1	...................	.......................	...................	.............................................................	0	6606	0.738018
LC279264.1	...................	.......................	...................	.............................................................	0	6606	0.738018
FJ032350.1	...................	.......................	...................	.............................................................	0	6606	0.738018
FJ032351.1	...................	.......................	...................	.............................................................	0	6606	0.738018
FJ386619.1	...................	.......................	...................	.............................................................	0	6606	0.738018
FJ562293.1	...................	.......................	...................	.............................................................	0	6606	0.738018
FJ386667.1	...................	.......................	...................	.............................................................	0	6606	0.738018
MT645050.1	...................	.......................	...................	.............................................................	0	6606	0.738018
MT645052.1	...................	.......................	...................	.............................................................	0	6606	0.738018
KC774324.1	...................	.......................	...................	.............................................................	0	6606	0.738018
FJ386659.1	...................	.......................	...................	.............................................................	0	6606	0.738018
LC279275.1	...................	.......................	...................	.............................................................	0	6606	0.738018
FJ386618.1	...................	.......................	...................	.............................................................	0	6606	0.738018
JQ040131.1	...................	.......................	...................	.............................................................	0	6606	0.738018
KR013814.1	...................	.......................	...................	.............................................................	0	6606	0.738018
KR013809.1	...................	.......................	...................	.............................................................	0	6606	0.738018
KR013810.1	...................	.......................	...................	.............................................................	0	6606	0.738018
FJ386662.1	...................	.......................	...................	.............................................................	0	6606	0.738018
GQ377609.1	...................	.......................	...................	.............................................................	0	6606	0.738018
KR013827.1	...................	.......................	...................	.............................................................	0	6606	0.738018
FJ562292.1	...................	.......................	...................	.............................................................	0	6606	0.738018
KJ173432.1	...................	.......................	...................	.............................................................	0	6606	0.738018
FJ899776.1	...................	.......................	...................	.............................................................	0	6606	0.738018
FJ787486.1	...................	.......................	...................	.............................................................	0	6606	0.738018
EU560441.1	...................	.......................	...................	.............................................................	0	6606	0.738018
KR013864.1	...................	.......................	...................	.............................................................	0	6606	0.738018
KR013866.1	...................	.......................	...................	.............................................................	0	6606	0.738018
JX026887.1	...................	.......................	...................	.............................................................	0	6606	0.738018
FJ386578.1	...................	.......................	...................	.............................................................	0	6606	0.738018
FJ386585.1	...................	.......................	...................	.............................................................	0	6606	0.738018
FJ386633.1	...................	.......................	...................	.............................................................	0	6606	0.738018
GQ377530.1	...................	.......................	...................	.............................................................	0	6606	0.738018
GQ377524.1	...................	.......................	...................	.............................................................	0	6606	0.738018
KC774231.1	...................	.......................	...................	.............................................................	0	6606	0.738018
JX504544.1	...................	.......................	...................	.............................................................	0	6606	0.738018
JX429917.1	...................	.......................	...................	.............................................................	0	6606	0.738018
EU916230.1	...................	.......................	...................	.............................................................	0	6606	0.738018
EU916210.1	...................	.......................	...................	.............................................................	0	6606	0.738018
KY470898.1	...................	.......................	...................	.............................................................	0	6606	0.738018
KC774239.1	...................	.......................	...................	.............................................................	0	6606	0.738018
MG893561.1	...................	.......................	...................	.............................................................	0	6606	0.738018
KR013801.1	...................	.......................	...................	.............................................................	0	6606	0.738018
MG893560.1	...................	.......................	...................	.............................................................	0	6606	0.738018
KR013872.1	...................	.......................	...................	.............................................................	0	6606	0.738018
KR013876.1	...................	.......................	...................	.............................................................	0	6606	0.738018
KY881736.1	...................	.......................	...................	.............................................................	0	6606	0.738018
KY881738.1	...................	.......................	...................	.............................................................	0	6606	0.738018
KY881739.1	...................	.......................	...................	.............................................................	0	6606	0.738018
KY881742.1	...................	.......................	...................	.............................................................	0	6606	0.738018
KY881743.1	...................	.......................	...................	.............................................................	0	6606	0.738018
KY881748.1	...................	.......................	...................	.............................................................	0	6606	0.738018
KY881749.1	...................	.......................	...................	.............................................................	0	6606	0.738018
KY881750.1	...................	.......................	...................	.............................................................	0	6606	0.738018
KY881751.1	...................	.......................	...................	.............................................................	0	6606	0.738018
KY881754.1	...................	.......................	...................	.............................................................	0	6606	0.738018
KY881755.1	...................	.......................	...................	.............................................................	0	6606	0.738018
KY881758.1	...................	.......................	...................	.............................................................	0	6606	0.738018
KY881762.1	...................	.......................	...................	.............................................................	0	6606	0.738018
KY881763.1	...................	.......................	...................	.............................................................	0	6606	0.738018
KY881764.1	...................	.......................	...................	.............................................................	0	6606	0.738018
KY881766.1	...................	.......................	...................	.............................................................	0	6606	0.738018
KY881767.1	...................	.......................	...................	.............................................................	0	6606	0.738018
KY881768.1	...................	.......................	...................	.............................................................	0	6606	0.738018
KY881769.1	...................	.......................	...................	.............................................................	0	6606	0.738018
KY881770.1	...................	.......................	...................	.............................................................	0	6606	0.738018
KY881771.1	...................	.......................	...................	.............................................................	0	6606	0.738018
KY881772.1	...................	.......................	...................	.............................................................	0	6606	0.738018
KY881773.1	...................	.......................	...................	.............................................................	0	6606	0.738018
KY881774.1	...................	.......................	...................	.............................................................	0	6606	0.738018
KY881775.1	...................	.......................	...................	.............................................................	0	6606	0.738018
KY881776.1	...................	.......................	...................	.............................................................	0	6606	0.738018
KY881777.1	...................	.......................	...................	.............................................................	0	6606	0.738018
KY881737.1	...................	.......................	...................	.............................................................	0	6606	0.738018
KY881744.1	...................	.......................	...................	.............................................................	0	6606	0.738018
KY881765.1	...................	.......................	...................	.............................................................	0	6606	0.738018
FJ562277.1	...................	.......................	...................	.............................................................	0	6606	0.738018
KR013858.1	...................	.......................	...................	.............................................................	0	6606	0.738018
JX026884.1	...................	.......................	...................	.............................................................	0	6606	0.738018
KR013802.1	...................	.......................	...................	.............................................................	0	6606	0.738018
KR013807.1	...................	.......................	...................	.............................................................	0	6606	0.738018
JX026885.1	...................	.......................	...................	.............................................................	0	6606	0.738018
FJ518813.1	...................	.......................	...................	.............................................................	0	6606	0.738018
KJ598706.1	...................	.......................	...................	.............................................................	0	6606	0.738018
KJ598710.1	...................	.......................	...................	.............................................................	0	6606	0.738018
FJ787447.1	...................	.......................	...................	.............................................................	0	6606	0.738018
GQ377521.1	...................	.......................	...................	.............................................................	0	6606	0.738018
KC774210.1	...................	.......................	...................	.............................................................	0	6606	0.738018
FJ386670.1	...................	.......................	...................	.............................................................	0	6606	0.738018
FJ386653.1	...................	.......................	...................	.............................................................	0	6606	0.738018
JX504534.1	...................	.......................	...................	.............................................................	0	6606	0.738018
FJ386597.1	...................	.......................	...................	.............................................................	0	6606	0.738018
FJ386661.1	...................	.......................	...................	.............................................................	0	6606	0.738018
FJ386604.1	...................	.......................	...................	.............................................................	0	6606	0.738018
FJ562266.1	...................	.......................	...................	.............................................................	0	6606	0.738018
FJ562272.1	...................	.......................	...................	.............................................................	0	6606	0.738018
FJ562313.1	...................	.......................	...................	.............................................................	0	6606	0.738018
FJ562315.1	...................	.......................	...................	.............................................................	0	6606	0.738018
KY881809.1	...................	.......................	...................	.............................................................	0	6606	0.738018
KY881813.1	...................	.......................	...................	.............................................................	0	6606	0.738018
KY881802.1	...................	.......................	...................	.............................................................	0	6606	0.738018
KY881817.1	...................	.......................	...................	.............................................................	0	6606	0.738018
KY881811.1	...................	.......................	...................	.............................................................	0	6606	0.738018
MT645038.1	...................	.......................	...................	.............................................................	0	6606	0.738018
FJ386592.1	...................	.......................	...................	.............................................................	0	6606	0.738018
FJ562261.1	...................	.......................	...................	.............................................................	0	6606	0.738018
FJ032356.1	...................	.......................	...................	.............................................................	0	6606	0.738018
FJ386649.1	...................	.......................	...................	.............................................................	0	6606	0.738018
FJ562251.1	...................	.......................	...................	.............................................................	0	6606	0.738018
FJ562340.1	...................	.......................	...................	.............................................................	0	6606	0.738018
JF436920.1	...................	.......................	...................	.............................................................	0	6606	0.738018
KR013804.1	...................	.......................	...................	.............................................................	0	6606	0.738018
KY470975.1	...................	.......................	...................	.............................................................	0	6606	0.738018
KY470966.1	...................	.......................	...................	.............................................................	0	6606	0.738018
KY470973.1	...................	.......................	...................	.............................................................	0	6606	0.738018
KY470970.1	...................	.......................	...................	.............................................................	0	6606	0.738018
KY470967.1	...................	.......................	...................	.............................................................	0	6606	0.738018
KY470965.1	...................	.......................	...................	.............................................................	0	6606	0.738018
KY470969.1	...................	.......................	...................	.............................................................	0	6606	0.738018
KY470974.1	...................	.......................	...................	.............................................................	0	6606	0.738018
KY470976.1	...................	.......................	...................	.............................................................	0	6606	0.738018
KY470971.1	...................	.......................	...................	.............................................................	0	6606	0.738018
KY470972.1	...................	.......................	...................	.............................................................	0	6606	0.738018
KY470968.1	...................	.......................	...................	.............................................................	0	6606	0.738018
KY470978.1	...................	.......................	...................	.............................................................	0	6606	0.738018
KY470979.1	...................	.......................	...................	.............................................................	0	6606	0.738018
LC064755.1	...................	.......................	...................	.............................................................	0	6606	0.738018
MN535017.1	...................	.......................	...................	.............................................................	0	6606	0.738018
KJ173329.1	...................	.......................	...................	.............................................................	0	6606	0.738018
KC774218.1	...................	.......................	...................	.............................................................	0	6606	0.738018
KC774358.1	...................	.......................	...................	.............................................................	0	6606	0.738018
EU916233.1	...................	.......................	...................	.............................................................	0	6606	0.738018
FJ787452.1	...................	.......................	...................	.............................................................	0	6606	0.738018
KJ598743.1	...................	.......................	...................	.............................................................	0	6606	0.738018
KJ598751.1	...................	.......................	...................	.............................................................	0	6606	0.738018
KJ598742.1	...................	.......................	...................	.............................................................	0	6606	0.738018
KJ598748.1	...................	.......................	...................	.............................................................	0	6606	0.738018
KJ598746.1	...................	.......................	...................	.............................................................	0	6606	0.738018
KJ598754.1	...................	.......................	...................	.............................................................	0	6606	0.738018
KJ598744.1	...................	.......................	...................	.............................................................	0	6606	0.738018
KJ598741.1	...................	.......................	...................	.............................................................	0	6606	0.738018
KJ598747.1	...................	.......................	...................	.............................................................	0	6606	0.738018
KC774301.1	...................	.......................	...................	.............................................................	0	6606	0.738018
FJ562269.1	...................	.......................	...................	.............................................................	0	6606	0.738018
FJ562305.1	...................	.......................	...................	.............................................................	0	6606	0.738018
KJ598714.1	...................	.......................	...................	.............................................................	0	6606	0.738018
KJ598719.1	...................	.......................	...................	.............................................................	0	6606	0.738018
KJ598715.1	...................	.......................	...................	.............................................................	0	6606	0.738018
KJ598707.1	...................	.......................	...................	.............................................................	0	6606	0.738018
KJ598717.1	...................	.......................	...................	.............................................................	0	6606	0.738018
KJ598718.1	...................	.......................	...................	.............................................................	0	6606	0.738018
KJ598709.1	...................	.......................	...................	.............................................................	0	6606	0.738018
KJ598705.1	...................	.......................	...................	.............................................................	0	6606	0.738018
KJ598711.1	...................	.......................	...................	.............................................................	0	6606	0.738018
KJ598712.1	...................	.......................	...................	.............................................................	0	6606	0.738018
KJ598708.1	...................	.......................	...................	.............................................................	0	6606	0.738018
KJ598713.1	...................	.......................	...................	.............................................................	0	6606	0.738018
KC774295.1	...................	.......................	...................	.............................................................	0	6606	0.738018
KJ173395.1	...................	.......................	...................	.............................................................	0	6606	0.738018
GQ377544.1	...................	.......................	...................	.............................................................	0	6606	0.738018
KC774310.1	...................	.......................	...................	.............................................................	0	6606	0.738018
KT284755.1	...................	.......................	...................	.............................................................	0	6606	0.738018
LC373511.1	...................	.......................	...................	.............................................................	0	6606	0.738018
LC373512.1	...................	.......................	...................	.............................................................	0	6606	0.738018
KJ173437.1	...................	.......................	...................	.............................................................	0	6606	0.738018
KJ173438.1	...................	.......................	...................	.............................................................	0	6606	0.738018
KJ173287.1	...................	.......................	...................	.............................................................	0	6606	0.738018
GU434374.1	...................	.......................	...................	.............................................................	0	6606	0.738018
GQ377546.1	...................	.......................	...................	.............................................................	0	6606	0.738018
KJ173435.1	...................	.......................	...................	.............................................................	0	6606	0.738018
KJ173436.1	...................	.......................	...................	.............................................................	0	6606	0.738018
KJ173443.1	...................	.......................	...................	.............................................................	0	6606	0.738018
KJ173444.1	...................	.......................	...................	.............................................................	0	6606	0.738018
JX429906.1	...................	.......................	...................	.............................................................	0	6606	0.738018
KJ173293.1	...................	.......................	...................	.............................................................	0	6606	0.738018
KJ173294.1	...................	.......................	...................	.............................................................	0	6606	0.738018
KJ173315.1	...................	.......................	...................	.............................................................	0	6606	0.738018
JX429896.1	...................	.......................	...................	.............................................................	0	6606	0.738018
KJ173310.1	...................	.......................	...................	.............................................................	0	6606	0.738018
KC774248.1	...................	.......................	...................	.............................................................	0	6606	0.738018
KC774249.1	...................	.......................	...................	.............................................................	0	6606	0.738018
KC774347.1	...................	.......................	...................	.............................................................	0	6606	0.738018
KC774294.1	...................	.......................	...................	.............................................................	0	6606	0.738018
FJ562283.1	...................	.......................	...................	.............................................................	0	6606	0.738018
KC774268.1	...................	.......................	...................	.............................................................	0	6606	0.738018
KC774276.1	...................	.......................	...................	.............................................................	0	6606	0.738018
KC774327.1	...................	.......................	...................	.............................................................	0	6606	0.738018
KJ598681.1	...................	.......................	...................	.............................................................	0	6606	0.738018
FJ787453.1	...................	.......................	...................	.............................................................	0	6606	0.738018
KJ173332.1	...................	.......................	...................	.............................................................	0	6606	0.738018
GQ377551.1	...................	.......................	...................	.............................................................	0	6606	0.738018
LC279259.1	...................	.......................	...................	.............................................................	0	6606	0.738018
LC279260.1	...................	.......................	...................	.............................................................	0	6606	0.738018
LC279262.1	...................	.......................	...................	.............................................................	0	6606	0.738018
KJ598740.1	...................	.......................	...................	.............................................................	0	6606	0.738018
KJ598749.1	...................	.......................	...................	.............................................................	0	6606	0.738018
KJ598694.1	...................	.......................	...................	.............................................................	0	6606	0.738018
KJ598689.1	...................	.......................	...................	.............................................................	0	6606	0.738018
KJ598698.1	...................	.......................	...................	.............................................................	0	6606	0.738018
MT645031.1	...................	.......................	...................	.............................................................	0	6606	0.738018
JX429904.1	...................	.......................	...................	.............................................................	0	6606	0.738018
FJ032359.1	...................	.......................	...................	.............................................................	0	6606	0.738018
FJ032361.1	...................	.......................	...................	.............................................................	0	6606	0.738018
KJ173288.1	...................	.......................	...................	.............................................................	0	6606	0.738018
FJ386637.1	...................	.......................	...................	.............................................................	0	6606	0.738018
FJ386574.1	...................	.......................	...................	.............................................................	0	6606	0.738018
LC730886.1	...................	.......................	...................	.............................................................	0	6606	0.738018
KR013832.1	...................	.......................	...................	.............................................................	0	6606	0.738018
KR013830.1	...................	.......................	...................	.............................................................	0	6606	0.738018
KR013833.1	...................	.......................	...................	.............................................................	0	6606	0.738018
KR013834.1	...................	.......................	...................	.............................................................	0	6606	0.738018
KJ173306.1	...................	.......................	...................	.............................................................	0	6606	0.738018
MG893553.1	...................	.......................	...................	.............................................................	0	6606	0.738018
JQ040162.1	...................	.......................	...................	.............................................................	0	6606	0.738018
MT645034.1	...................	.......................	...................	.............................................................	0	6606	0.738018
LC458432.1	...................	.......................	...................	.............................................................	0	6606	0.738018
KC774360.1	...................	.......................	...................	.............................................................	0	6606	0.738018
LC318702.1	...................	.......................	...................	.............................................................	0	6606	0.738018
GQ377637.1	...................	.......................	...................	.............................................................	0	6606	0.738018
KJ173391.1	...................	.......................	...................	.............................................................	0	6606	0.738018
KJ173392.1	...................	.......................	...................	.............................................................	0	6606	0.738018
KJ173304.1	...................	.......................	...................	.............................................................	0	6606	0.738018
KJ173307.1	...................	.......................	...................	.............................................................	0	6606	0.738018
KJ173308.1	...................	.......................	...................	.............................................................	0	6606	0.738018
KR013873.1	...................	.......................	...................	.............................................................	0	6606	0.738018
KR013877.1	...................	.......................	...................	.............................................................	0	6606	0.738018
MK720627.1	...................	.......................	...................	.............................................................	0	6606	0.738018
MK720628.1	...................	.......................	...................	.............................................................	0	6606	0.738018
MK321265.1	...................	.......................	...................	.............................................................	0	6606	0.738018
KP784761.1	...................	.......................	...................	.............................................................	0	6606	0.738018
GQ377619.1	...................	.......................	...................	.............................................................	0	6606	0.738018
KJ173429.1	...................	.......................	...................	.............................................................	0	6606	0.738018
KJ173430.1	...................	.......................	...................	.............................................................	0	6606	0.738018
KJ173427.1	...................	.......................	...................	.............................................................	0	6606	0.738018
KJ173428.1	...................	.......................	...................	.............................................................	0	6606	0.738018
GQ377642.1	...................	.......................	...................	.............................................................	0	6606	0.738018
GQ377640.1	...................	.......................	...................	.............................................................	0	6606	0.738018
FJ386577.1	...................	.......................	...................	.............................................................	0	6606	0.738018
FJ562275.1	...................	.......................	...................	.............................................................	0	6606	0.738018
GQ377617.1	...................	.......................	...................	.............................................................	0	6606	0.738018
MT645044.1	...................	.......................	...................	.............................................................	0	6606	0.738018
GQ377515.1	...................	.......................	...................	.............................................................	0	6606	0.738018
GQ377574.1	...................	.......................	...................	.............................................................	0	6606	0.738018
GQ205441.1	...................	.......................	...................	.............................................................	0	6606	0.738018
FJ562244.1	...................	.......................	...................	.............................................................	0	6606	0.738018
FJ562252.1	...................	.......................	...................	.............................................................	0	6606	0.738018
KC774359.1	...................	.......................	...................	.............................................................	0	6606	0.738018
KR013803.1	...................	.......................	...................	.............................................................	0	6606	0.738018
KR013806.1	...................	.......................	...................	.............................................................	0	6606	0.738018
LC279261.1	...................	.......................	...................	.............................................................	0	6606	0.738018
KY881980.1	...................	.......................	...................	.............................................................	0	6606	0.738018
KJ173281.1	...................	.......................	...................	.............................................................	0	6606	0.738018
KJ598753.1	...................	.......................	...................	.............................................................	0	6606	0.738018
KJ598752.1	...................	.......................	...................	.............................................................	0	6606	0.738018
KJ173302.1	...................	.......................	...................	.............................................................	0	6606	0.738018
KJ173289.1	...................	.......................	...................	.............................................................	0	6606	0.738018
KJ173301.1	...................	.......................	...................	.............................................................	0	6606	0.738018
KJ173309.1	...................	.......................	...................	.............................................................	0	6606	0.738018
KJ173337.1	...................	.......................	...................	.............................................................	0	6606	0.738018
GQ377615.1	...................	.......................	...................	.............................................................	0	6606	0.738018
KT284754.1	...................	.......................	...................	.............................................................	0	6606	0.738018
KJ598716.1	...................	.......................	...................	.............................................................	0	6606	0.738018
JX429912.1	...................	.......................	...................	.............................................................	0	6606	0.738018
KR013829.1	...................	.......................	...................	.............................................................	0	6606	0.738018
KR014020.1	...................	.......................	...................	.............................................................	0	6606	0.738018
GQ377580.1	...................	.......................	...................	.............................................................	0	6606	0.738018
KJ173312.1	...................	.......................	...................	.............................................................	0	6606	0.738018
GQ377516.1	...................	.......................	...................	.............................................................	0	6606	0.738018
LC279263.1	...................	.......................	...................	.............................................................	0	6606	0.738018
LC279265.1	...................	.......................	...................	.............................................................	0	6606	0.738018
LC279266.1	...................	.......................	...................	.............................................................	0	6606	0.738018
LC279267.1	...................	.......................	...................	.............................................................	0	6606	0.738018
GQ377633.1	...................	.......................	...................	.............................................................	0	6606	0.738018
JX504536.1	...................	.......................	...................	.............................................................	0	6606	0.738018
FJ386579.1	...................	.......................	...................	.............................................................	0	6606	0.738018
FJ562308.1	...................	.......................	...................	.............................................................	0	6606	0.738018
MT645055.1	...................	.......................	...................	.............................................................	0	6606	0.738018
GQ377584.1	...................	.......................	...................	.............................................................	0	6606	0.738018
KJ173431.1	...................	.......................	...................	.............................................................	0	6606	0.738018
GQ377571.1	...................	.......................	...................	.............................................................	0	6606	0.738018
GQ377581.1	...................	.......................	...................	.............................................................	0	6606	0.738018
EU522068.1	...................	.......................	...................	.............................................................	0	6606	0.738018
FJ386595.1	...................	.......................	...................	.............................................................	0	6606	0.738018
JQ040145.1	...................	.......................	...................	.............................................................	0	6606	0.738018
JX429918.1	...................	.......................	...................	.............................................................	0	6606	0.738018
FJ562235.1	...................	.......................	...................	.............................................................	0	6606	0.738018
KJ173433.1	...................	.......................	...................	.............................................................	0	6606	0.738018
KJ173434.1	...................	.......................	...................	.............................................................	0	6606	0.738018
KR013812.1	...................	.......................	...................	.............................................................	0	6606	0.738018
KR013813.1	...................	.......................	...................	.............................................................	0	6606	0.738018
KR013816.1	...................	.......................	...................	.............................................................	0	6606	0.738018
FJ032360.1	...................	.......................	...................	.............................................................	0	6606	0.738018
KJ173317.1	...................	.......................	...................	.............................................................	0	6606	0.738018
FJ787454.1	...................	.......................	...................	.............................................................	0	6606	0.738018
JQ040163.1	...................	.......................	...................	.............................................................	0	6606	0.738018
KC774293.1	...................	.......................	...................	.............................................................	0	6606	0.738018
KY470896.1	...................	.......................	...................	.............................................................	0	6606	0.738018
KY470895.1	...................	.......................	...................	.............................................................	0	6606	0.738018
KY470899.1	...................	.......................	...................	.............................................................	0	6606	0.738018
KY470903.1	...................	.......................	...................	.............................................................	0	6606	0.738018
KY470894.1	...................	.......................	...................	.............................................................	0	6606	0.738018
KY470901.1	...................	.......................	...................	.............................................................	0	6606	0.738018
KY470902.1	...................	.......................	...................	.............................................................	0	6606	0.738018
KY470897.1	...................	.......................	...................	.............................................................	0	6606	0.738018
KY470905.1	...................	.......................	...................	.............................................................	0	6606	0.738018
KY470904.1	...................	.......................	...................	.............................................................	0	6606	0.738018
KY470893.1	...................	.......................	...................	.............................................................	0	6606	0.738018
KC774241.1	...................	.......................	...................	.............................................................	0	6606	0.738018
GQ377579.1	...................	.......................	...................	.............................................................	0	6606	0.738018
KJ173325.1	...................	.......................	...................	.............................................................	0	6606	0.738018
KJ173326.1	...................	.......................	...................	.............................................................	0	6606	0.738018
JX504546.1	...................	.......................	...................	.............................................................	0	6606	0.738018
FJ386609.1	...................	.......................	...................	.............................................................	0	6606	0.738018
JQ040172.1	...................	.......................	...................	.............................................................	0	6606	0.738018
KC774237.1	...................	.......................	...................	.............................................................	0	6606	0.738018
[truncated: 6,965 more rows]

## Sheet: Genotype A
	forward primer sequence	probe sequence	reverse primer sequence	sequence of forward primer, probe and reverse primer stitched
NCBI accession number	CCGTGTGCACTTCGCTTCA	CATGGAGACCACCGTGAACGCCC	TCAAGCCTCCAAGCTGTGC	CCGTGTGCACTTCGCTTCACATGGAGACCACCGTGAACGCCCTCAAGCCTCCAAGCTGTGC	number of mismatches	number of sequences with this particular pattern of mismatches	% of analyzed sequences
HE974371.1	...................	.......................	...................	.............................................................	0	18	0.692308
HE974364.1	...................	.......................	...................	.............................................................	0	18	0.692308
HE974374.1	...................	.......................	...................	.............................................................	0	18	0.692308
HE974383.1	...................	.......................	...................	.............................................................	0	18	0.692308
HE974376.1	...................	.......................	...................	.............................................................	0	18	0.692308
AP007263.1	...................	.......................	...................	.............................................................	0	18	0.692308
LC533934.1	...................	.......................	...................	.............................................................	0	18	0.692308
HE974375.1	...................	.......................	...................	.............................................................	0	18	0.692308
HE974370.1	...................	.......................	...................	.............................................................	0	18	0.692308
HE974381.1	...................	.......................	...................	.............................................................	0	18	0.692308
LC519788.1	...................	.......................	...................	.............................................................	0	18	0.692308
HE974362.1	...................	.......................	...................	.............................................................	0	18	0.692308
LC519791.1	...................	.......................	...................	.............................................................	0	18	0.692308
LC519817.1	...................	.......................	...................	.............................................................	0	18	0.692308
LC519794.1	...................	.......................	...................	.............................................................	0	18	0.692308
LC519806.1	...................	.......................	...................	.............................................................	0	18	0.692308
HE974365.1	...................	.......................	...................	.............................................................	0	18	0.692308
LC519823.1	...................	.......................	...................	.............................................................	0	18	0.692308
LC519819.1	...................	......A................	...................	.........................A...................................	1	5	0.192308
LC519815.1	...................	......A................	...................	.........................A...................................	1	5	0.192308
LC519798.1	...................	......A................	...................	.........................A...................................	1	5	0.192308
LC519811.1	...................	......A................	...................	.........................A...................................	1	5	0.192308
LC519820.1	...................	......A................	...................	.........................A...................................	1	5	0.192308
HE974367.1	...................	.....C.................	...................	........................C....................................	1	2	0.0769231
LC488828.1	...................	.....C.................	...................	........................C....................................	1	2	0.0769231
HE974363.1	...................	......R................	...................	.........................R...................................	1	1	0.0384615

## Sheet: Genotype B
	forward primer sequence	probe sequence	reverse primer sequence	sequence of forward primer, probe and reverse primer stitched
NCBI accession number	CCGTGTGCACTTCGCTTCA	CATGGAGACCACCGTGAACGCCC	TCAAGCCTCCAAGCTGTGC	CCGTGTGCACTTCGCTTCACATGGAGACCACCGTGAACGCCCTCAAGCCTCCAAGCTGTGC	number of mismatches	number of sequences with this particular pattern of mismatches	% of analyzed sequences
LC500247.1	...................	.......................	...................	.............................................................	0	27	0.771429
LC060789.1	...................	.......................	...................	.............................................................	0	27	0.771429
LC064380.1	...................	.......................	...................	.............................................................	0	27	0.771429
LC064372.1	...................	.......................	...................	.............................................................	0	27	0.771429
LC064376.1	...................	.......................	...................	.............................................................	0	27	0.771429
LC064373.1	...................	.......................	...................	.............................................................	0	27	0.771429
LC064366.1	...................	.......................	...................	.............................................................	0	27	0.771429
LC057377.1	...................	.......................	...................	.............................................................	0	27	0.771429
LC060790.1	...................	.......................	...................	.............................................................	0	27	0.771429
LC064375.1	...................	.......................	...................	.............................................................	0	27	0.771429
LC064377.1	...................	.......................	...................	.............................................................	0	27	0.771429
LC064381.1	...................	.......................	...................	.............................................................	0	27	0.771429
LC064368.1	...................	.......................	...................	.............................................................	0	27	0.771429
LC064378.1	...................	.......................	...................	.............................................................	0	27	0.771429
LC064371.1	...................	.......................	...................	.............................................................	0	27	0.771429
LC057378.1	...................	.......................	...................	.............................................................	0	27	0.771429
LC064367.1	...................	.......................	...................	.............................................................	0	27	0.771429
LC064369.1	...................	.......................	...................	.............................................................	0	27	0.771429
LC063767.1	...................	.......................	...................	.............................................................	0	27	0.771429
LC064370.1	...................	.......................	...................	.............................................................	0	27	0.771429
AB540582.1	...................	.......................	...................	.............................................................	0	27	0.771429
LC036263.1	...................	.......................	...................	.............................................................	0	27	0.771429
AB554017.1	...................	.......................	...................	.............................................................	0	27	0.771429
LC456127.1	...................	.......................	...................	.............................................................	0	27	0.771429
AB981581.1	...................	.......................	...................	.............................................................	0	27	0.771429
AB981582.1	...................	.......................	...................	.............................................................	0	27	0.771429
AB981583.1	...................	.......................	...................	.............................................................	0	27	0.771429
AB819611.1	...................	......A................	...................	.........................A...................................	1	8	0.228571
AB819612.1	...................	......A................	...................	.........................A...................................	1	8	0.228571
AB819613.1	...................	......A................	...................	.........................A...................................	1	8	0.228571
AB819614.1	...................	......A................	...................	.........................A...................................	1	8	0.228571
LC064379.1	...................	......A................	...................	.........................A...................................	1	8	0.228571
AB602818.1	...................	......A................	...................	.........................A...................................	1	8	0.228571
LC064374.1	...................	......A................	...................	.........................A...................................	1	8	0.228571
LC456112.1	...................	......A................	...................	.........................A...................................	1	8	0.228571

## Sheet: Genotype C
	forward primer sequence	probe sequence	reverse primer sequence	sequence of forward primer, probe and reverse primer stitched
NCBI accession number	CCGTGTGCACTTCGCTTCA	CATGGAGACCACCGTGAACGCCC	TCAAGCCTCCAAGCTGTGC	CCGTGTGCACTTCGCTTCACATGGAGACCACCGTGAACGCCCTCAAGCCTCCAAGCTGTGC	number of mismatches	number of sequences with this particular pattern of mismatches	% of analyzed sequences
LC535924.1	...................	.......................	...................	.............................................................	0	75	0.630252
LC535945.1	...................	.......................	...................	.............................................................	0	75	0.630252
AB644280.1	...................	.......................	...................	.............................................................	0	75	0.630252
AB644281.1	...................	.......................	...................	.............................................................	0	75	0.630252
AB644287.1	...................	.......................	...................	.............................................................	0	75	0.630252
AB560661.1	...................	.......................	...................	.............................................................	0	75	0.630252
AB554025.1	...................	.......................	...................	.............................................................	0	75	0.630252
AB554018.1	...................	.......................	...................	.............................................................	0	75	0.630252
AB560662.1	...................	.......................	...................	.............................................................	0	75	0.630252
AB554019.1	...................	.......................	...................	.............................................................	0	75	0.630252
AB554020.1	...................	.......................	...................	.............................................................	0	75	0.630252
AB554022.1	...................	.......................	...................	.............................................................	0	75	0.630252
AB554015.1	...................	.......................	...................	.............................................................	0	75	0.630252
AB554014.1	...................	.......................	...................	.............................................................	0	75	0.630252
AB554021.1	...................	.......................	...................	.............................................................	0	75	0.630252
AB644286.1	...................	.......................	...................	.............................................................	0	75	0.630252
AB644283.1	...................	.......................	...................	.............................................................	0	75	0.630252
AB644284.1	...................	.......................	...................	.............................................................	0	75	0.630252
LC516605.1	...................	.......................	...................	.............................................................	0	75	0.630252
LC360507.1	...................	.......................	...................	.............................................................	0	75	0.630252
LC155818.1	...................	.......................	...................	.............................................................	0	75	0.630252
LC155816.1	...................	.......................	...................	.............................................................	0	75	0.630252
LC155819.1	...................	.......................	...................	.............................................................	0	75	0.630252
LC155817.1	...................	.......................	...................	.............................................................	0	75	0.630252
AB540584.1	...................	.......................	...................	.............................................................	0	75	0.630252
LC516606.1	...................	.......................	...................	.............................................................	0	75	0.630252
LC064754.1	...................	.......................	...................	.............................................................	0	75	0.630252
LC064755.1	...................	.......................	...................	.............................................................	0	75	0.630252
LC170474.1	...................	.......................	...................	.............................................................	0	75	0.630252
LC535928.1	...................	.......................	...................	.............................................................	0	75	0.630252
LC456130.1	...................	.......................	...................	.............................................................	0	75	0.630252
LC535912.1	...................	.......................	...................	.............................................................	0	75	0.630252
LC456116.1	...................	.......................	...................	.............................................................	0	75	0.630252
LC456115.1	...................	.......................	...................	.............................................................	0	75	0.630252
LC456121.1	...................	.......................	...................	.............................................................	0	75	0.630252
LC456126.1	...................	.......................	...................	.............................................................	0	75	0.630252
LC456129.1	...................	.......................	...................	.............................................................	0	75	0.630252
LC456132.1	...................	.......................	...................	.............................................................	0	75	0.630252
LC456128.1	...................	.......................	...................	.............................................................	0	75	0.630252
LC456131.1	...................	.......................	...................	.............................................................	0	75	0.630252
LC535913.1	...................	.......................	...................	.............................................................	0	75	0.630252
LC535923.1	...................	.......................	...................	.............................................................	0	75	0.630252
LC456110.1	...................	.......................	...................	.............................................................	0	75	0.630252
LC456111.1	...................	.......................	...................	.............................................................	0	75	0.630252
LC535916.1	...................	.......................	...................	.............................................................	0	75	0.630252
LC535917.1	...................	.......................	...................	.............................................................	0	75	0.630252
LC535931.1	...................	.......................	...................	.............................................................	0	75	0.630252
LC535949.1	...................	.......................	...................	.............................................................	0	75	0.630252
LC456135.1	...................	.......................	...................	.............................................................	0	75	0.630252
LC456133.1	...................	.......................	...................	.............................................................	0	75	0.630252
LC519821.1	...................	.......................	...................	.............................................................	0	75	0.630252
LC535938.1	...................	.......................	...................	.............................................................	0	75	0.630252
LC535932.1	...................	.......................	...................	.............................................................	0	75	0.630252
LC535933.1	...................	.......................	...................	.............................................................	0	75	0.630252
LC535926.1	...................	.......................	...................	.............................................................	0	75	0.630252
LC535937.1	...................	.......................	...................	.............................................................	0	75	0.630252
LC535930.1	...................	.......................	...................	.............................................................	0	75	0.630252
LC519822.1	...................	.......................	...................	.............................................................	0	75	0.630252
LC535927.1	...................	.......................	...................	.............................................................	0	75	0.630252
LC519797.1	...................	.......................	...................	.............................................................	0	75	0.630252
LC519803.1	...................	.......................	...................	.............................................................	0	75	0.630252
LC519804.1	...................	.......................	...................	.............................................................	0	75	0.630252
LC456118.1	...................	.......................	...................	.............................................................	0	75	0.630252
LC535921.1	...................	.......................	...................	.............................................................	0	75	0.630252
LC535922.1	...................	.......................	...................	.............................................................	0	75	0.630252
LC519818.1	...................	.......................	...................	.............................................................	0	75	0.630252
LC456122.1	...................	.......................	...................	.............................................................	0	75	0.630252
LC519796.1	...................	.......................	...................	.............................................................	0	75	0.630252
LC535946.1	...................	.......................	...................	.............................................................	0	75	0.630252
LC535925.1	...................	.......................	...................	.............................................................	0	75	0.630252
LC535935.1	...................	.......................	...................	.............................................................	0	75	0.630252
LC535934.1	...................	.......................	...................	.............................................................	0	75	0.630252
LC535914.1	...................	.......................	...................	.............................................................	0	75	0.630252
LC456117.1	...................	.......................	...................	.............................................................	0	75	0.630252
LC456125.1	...................	.......................	...................	.............................................................	0	75	0.630252
AB819615.1	...................	......A................	...................	.........................A...................................	1	20	0.168067
AB819616.1	...................	......A................	...................	.........................A...................................	1	20	0.168067
AB819617.1	...................	......A................	...................	.........................A...................................	1	20	0.168067
AB819618.1	...................	......A................	...................	.........................A...................................	1	20	0.168067
LC516607.1	...................	......A................	...................	.........................A...................................	1	20	0.168067
LC170475.1	...................	......A................	...................	.........................A...................................	1	20	0.168067
LC535915.1	...................	......A................	...................	.........................A...................................	1	20	0.168067
LC456119.1	...................	......A................	...................	.........................A...................................	1	20	0.168067
LC456114.1	...................	......A................	...................	.........................A...................................	1	20	0.168067
LC456113.1	...................	......A................	...................	.........................A...................................	1	20	0.168067
LC535950.1	...................	......A................	...................	.........................A...................................	1	20	0.168067
LC519800.1	...................	......A................	...................	.........................A...................................	1	20	0.168067
LC519801.1	...................	......A................	...................	.........................A...................................	1	20	0.168067
LC535942.1	...................	......A................	...................	.........................A...................................	1	20	0.168067
LC456120.1	...................	......A................	...................	.........................A...................................	1	20	0.168067
LC519790.1	...................	......A................	...................	.........................A...................................	1	20	0.168067
LC519792.1	...................	......A................	...................	.........................A...................................	1	20	0.168067
LC519799.1	...................	......A................	...................	.........................A...................................	1	20	0.168067
LC519812.1	...................	......A................	...................	.........................A...................................	1	20	0.168067
LC535936.1	...................	......A................	...................	.........................A...................................	1	20	0.168067
LC516608.1	...................	.....C.................	...................	........................C....................................	1	5	0.0420168
LC516609.1	...................	.....C.................	...................	........................C....................................	1	5	0.0420168
LC516610.1	...................	.....C.................	...................	........................C....................................	1	5	0.0420168
LC516604.1	...................	.....C.................	...................	........................C....................................	1	5	0.0420168
LC170476.1	...................	.....C.................	...................	........................C....................................	1	5	0.0420168
LC170477.1	...................	...................A...	...................	......................................A......................	1	4	0.0336134
LC456123.1	...................	...................A...	...................	......................................A......................	1	4	0.0336134
LC535947.1	...................	...................A...	...................	......................................A......................	1	4	0.0336134
LC535948.1	...................	...................A...	...................	......................................A......................	1	4	0.0336134
LC155814.1	...................	.....................T.	...................	........................................T....................	1	2	0.0168067
LC155815.1	...................	.....................T.	...................	........................................T....................	1	2	0.0168067
LC535918.1	...................	.............T.........	...................	................................T............................	1	2	0.0168067
LC535919.1	...................	.............T.........	...................	................................T............................	1	2	0.0168067
LC456124.1	...................	......................A	...................	.........................................A...................	1	1	0.00840336
LC519813.1	...................	......................T	...................	.........................................T...................	1	1	0.00840336
AY123041.1	...................	....................G..	...................	.......................................G.....................	1	1	0.00840336
AB981580.1	...................	..................T....	...................	.....................................T.......................	1	1	0.00840336
LC155820.1	...................	......R................	...................	.........................R...................................	1	1	0.00840336
LC456134.1	...................	......A...............T	...................	.........................A...............T...................	2	2	0.0168067
LC535939.1	...................	......A...............T	...................	.........................A...............T...................	2	2	0.0168067
AB540585.1	...................	......A................	.........Y.........	.........................A.........................Y.........	2	1	0.00840336
AB540583.1	...................	.....C.............A...	...................	........................C.............A......................	2	1	0.00840336
LC519807.1	...................	.....CA................	...................	........................CA...................................	2	1	0.00840336
LC519805.1	...................	......A...R........RT.T	...................	.........................A...R........RT.T...................	5	1	0.00840336

## Sheet: Genotype D
	forward primer sequence	probe sequence	reverse primer sequence	sequence of forward primer, probe and reverse primer stitched
NCBI accession number	CCGTGTGCACTTCGCTTCA	CATGGAGACCACCGTGAACGCCC	TCAAGCCTCCAAGCTGTGC	CCGTGTGCACTTCGCTTCACATGGAGACCACCGTGAACGCCCTCAAGCCTCCAAGCTGTGC	number of mismatches	number of sequences with this particular pattern of mismatches	% of analyzed sequences
HE974382.1	...................	.......................	...................	.............................................................	0	21	0.913043
HE974373.1	...................	.......................	...................	.............................................................	0	21	0.913043
HE974378.1	...................	.......................	...................	.............................................................	0	21	0.913043
LC519824.1	...................	.......................	...................	.............................................................	0	21	0.913043
LC519809.1	...................	.......................	...................	.............................................................	0	21	0.913043
LC519808.1	...................	.......................	...................	.............................................................	0	21	0.913043
AB267090.1	...................	.......................	...................	.............................................................	0	21	0.913043
LC519795.1	...................	.......................	...................	.............................................................	0	21	0.913043
LC519814.1	...................	.......................	...................	.............................................................	0	21	0.913043
LC519793.1	...................	.......................	...................	.............................................................	0	21	0.913043
LC519789.1	...................	.......................	...................	.............................................................	0	21	0.913043
LC488706.1	...................	.......................	...................	.............................................................	0	21	0.913043
LC519810.1	...................	.......................	...................	.............................................................	0	21	0.913043
LC519816.1	...................	.......................	...................	.............................................................	0	21	0.913043
AB554024.1	...................	.......................	...................	.............................................................	0	21	0.913043
AB554016.1	...................	.......................	...................	.............................................................	0	21	0.913043
AB554023.1	...................	.......................	...................	.............................................................	0	21	0.913043
HE815465.1	...................	.......................	...................	.............................................................	0	21	0.913043
HE974379.1	...................	.......................	...................	.............................................................	0	21	0.913043
LC519787.1	...................	.......................	...................	.............................................................	0	21	0.913043
HE974377.1	...................	.......................	...................	.............................................................	0	21	0.913043
HE974372.1	...............A...	.......................	...................	...............A.............................................	1	1	0.0434783
LC519802.1	...................	......A..........G.....	...................	.........................A..........G........................	2	1	0.0434783

## Sheet: Genotype E
	forward primer sequence	probe sequence	reverse primer sequence	sequence of forward primer, probe and reverse primer stitched
NCBI accession number	CCGTGTGCACTTCGCTTCA	CATGGAGACCACCGTGAACGCCC	TCAAGCCTCCAAGCTGTGC	CCGTGTGCACTTCGCTTCACATGGAGACCACCGTGAACGCCCTCAAGCCTCCAAGCTGTGC	number of mismatches	number of sequences with this particular pattern of mismatches	% of analyzed sequences
HE974380.1	...................	.......................	...................	.............................................................	0	7	0.875
LC513654.1	...................	.......................	...................	.............................................................	0	7	0.875
LC513657.1	...................	.......................	...................	.............................................................	0	7	0.875
AP007262.1	...................	.......................	...................	.............................................................	0	7	0.875
LC513651.1	...................	.......................	...................	.............................................................	0	7	0.875
LC513652.1	...................	.......................	...................	.............................................................	0	7	0.875
LC513656.1	...................	.......................	...................	.............................................................	0	7	0.875
HE974384.1	...................	......A................	...................	.........................A...................................	1	1	0.125

## Sheet: Genotype F
	forward primer sequence	probe sequence	reverse primer sequence	sequence of forward primer, probe and reverse primer stitched
NCBI accession number	CCGTGTGCACTTCGCTTCA	CATGGAGACCACCGTGAACGCCC	TCAAGCCTCCAAGCTGTGC	CCGTGTGCACTTCGCTTCACATGGAGACCACCGTGAACGCCCTCAAGCCTCCAAGCTGTGC	number of mismatches	number of sequences with this particular pattern of mismatches	% of analyzed sequences
HE974368.1	...................	.......................	...................	.............................................................	0	3	1
HE974366.1	...................	.......................	...................	.............................................................	0	3	1
HE974369.1	...................	.......................	...................	.............................................................	0	3	1

## Sheet: Genotype G
	forward primer sequence	probe sequence	reverse primer sequence	sequence of forward primer, probe and reverse primer stitched
NCBI accession number	CCGTGTGCACTTCGCTTCA	CATGGAGACCACCGTGAACGCCC	TCAAGCCTCCAAGCTGTGC	CCGTGTGCACTTCGCTTCACATGGAGACCACCGTGAACGCCCTCAAGCCTCCAAGCTGTGC	number of mismatches	number of sequences with this particular pattern of mismatches	% of analyzed sequences
AB625343.1	...................	......A...G..A.....A..T	...................	.........................A...G..A.....A..T...................	5	3	1
AB625342.1	...................	......A...G..A.....A..T	...................	.........................A...G..A.....A..T...................	5	3	1
AP007264.1	...................	......A...G..A.....A..T	...................	.........................A...G..A.....A..T...................	5	3	1

## Sheet: Genotype H
	forward primer sequence	probe sequence	reverse primer sequence	sequence of forward primer, probe and reverse primer stitched
NCBI accession number	CCGTGTGCACTTCGCTTCA	CATGGAGACCACCGTGAACGCCC	TCAAGCCTCCAAGCTGTGC	CCGTGTGCACTTCGCTTCACATGGAGACCACCGTGAACGCCCTCAAGCCTCCAAGCTGTGC	number of mismatches	number of sequences with this particular pattern of mismatches	% of analyzed sequences
AB516394.1	...................	.......................	...................	.............................................................	0	5	0.625
AB516393.1	...................	.......................	...................	.............................................................	0	5	0.625
LC491577.1	...................	.......................	...................	.............................................................	0	5	0.625
AB846650.1	...................	.......................	...................	.............................................................	0	5	0.625
AB298362.1	...................	.......................	...................	.............................................................	0	5	0.625
AP007261.1	...................	..........C............	...................	.............................C...............................	1	1	0.125
AY090454.1	..............G....	.......................	...................	..............G..............................................	1	1	0.125
AB516395.1	...................	.....GA................	...................	........................GA...................................	2	1	0.125

## Sheet: Genotype I
	forward primer sequence	probe sequence	reverse primer sequence	sequence of forward primer, probe and reverse primer stitched
NCBI accession number	CCGTGTGCACTTCGCTTCA	CATGGAGACCACCGTGAACGCCC	TCAAGCCTCCAAGCTGTGC	CCGTGTGCACTTCGCTTCACATGGAGACCACCGTGAACGCCCTCAAGCCTCCAAGCTGTGC	number of mismatches	number of sequences with this particular pattern of mismatches	% of analyzed sequences
AF241411.1	...................	......................A	...................	.........................................A...................	1	1	1
